# Supplementary material for: Putative Mitoviruses without In-Frame UGA(W) Codons: Evolutionary Implications
Source: Viruses. 2023 Jan 25;15(2):340. doi: 10.3390/v15020340 (PMC9965874; doi:10.3390/v15020340)
Supplement: Supplementary file 1 [file viruses-15-00340-s001.zip]

Archive with 5 entries (5 files):
- Supplementary Figures.pdf
- Table S1 - Details of sequences included in the phylogenetic reconstructions.xlsx
- Table S2 - Result of the initial tBLASTn search of the NCBI TSA database and selection criteria.xlsx
- Table S3 - Members of clades Kvaramitovirus and Arkeomitovirinae.xlsx
- Table S4 -  Molecular characteristics of mitoviruses and putative mitoviruses.xlsx
