# Supplementary material for: Putative Mitoviruses without In-Frame UGA(W) Codons: Evolutionary Implications
Source: Viruses. 2023 Jan 25;15(2):340. doi: 10.3390/v15020340 (PMC9965874; doi:10.3390/v15020340)
Supplement: Supplementary file 1 [file viruses-15-00340-s001.zip › Table S1 - Details of sequences included in the phylogenetic reconstructions.xlsx]

## Sheet: Table S1
Table S1: Sequences used for phylogenetic trees construction
Family	Genus	Species (ICTV accepted)	Virus name (NCBI taxonomy database)	RdRp NCBI accession code (aa)
Mitoviridae	Unuamitovirus	Unuamitovirus fugl1	Fusarium globosum mitovirus 1	BAQ36629
Mitoviridae	Unuamitovirus	Unuamitovirus grab1	Gremmeniella mitovirus S1	AAN05635
Mitoviridae	Unuamitovirus	Unuamitovirus fuve1	Fusarium verticillioides mitovirus 1	QPK91778
Mitoviridae	Unuamitovirus	Unuamitovirus fuco1	Fusarium coeruleum mitovirus 1	BAQ36630
Mitoviridae	Unuamitovirus	Unuamitovirus fuci2	Fusarium circinatum mitovirus 2-1	AHI43534
Mitoviridae	Duamitovirus	Duamitovirus scsc3	Sclerotinia sclerotiorum mitovirus 3	AGC24232
Mitoviridae	Duamitovirus	Duamitovirus rhso32	Rhizoctonia solani mitovirus 32	QDW65422
Mitoviridae	Duamitovirus	Duamitovirus scni2	Sclerotinia nivalis mitovirus 2	ANJ77670
Mitoviridae	Duamitovirus	Duamitovirus alal1	Alternaria alternata mitovirus 1	QDB74990
Mitoviridae	Duamitovirus	Duamitovirus azfi1	Azolla filiculoides mitovirus 1	DAB41741
Mitoviridae	Triamitovirus	Triamitovirus cespA	Ceratobasidium mitovirus A	AOX47577
Mitoviridae	Triamitovirus	Triamitovirus gesu1	Geopora sumneriana mitovirus 1	QDM55307
Mitoviridae	Triamitovirus	Triamitovirus rhor1	Rhizoctonia oryzae-sativae mitovirus 1	ANA08076
Mitoviridae	Triamitovirus	Triamitovirus rhcl1	Rhizophagus sp. RF1 mitovirus	BAJ23143
Mitoviridae	Triamitovirus	Triamitovirus tuex1	Tuber excavatum mitovirus	AEP83726
Mitoviridae	Kvaramitovirus	Kvaramitovirus opno7	Ophiostoma mitovirus 7	AGT55877
Mitoviridae	"Kvinmitovirus"	no assignment	Nebalia bipes mitovirus 1	DAZ90606
Mitoviridae	"Kvinmitovirus"	no assignment	Glomeridella minima mitovirus 1	DAZ90607
Mitoviridae	"Kvinmitovirus"	no assignment	Hanseniella sp. mitovirus 1	DAZ90608
Mitoviridae	"Kvinmitovirus"	no assignment	Halichondria panicea mitovirus 1	DAZ90600
Mitoviridae	"Kvinmitovirus"	no assignment	Lutzomyia longipalpis mitovirus 1	DAD49837
Narnaviridae	Narnavirus	Saccharomyces 20S RNA narnavirus	Saccharomyces 20S RNA narnavirus	NP_660178.1
Narnaviridae	Narnavirus	Saccharomyces 23S RNA narnavirus	Saccharomyces 23S RNA narnavirus	NP_660177.1
Narnaviridae	Narnavirus	no assignment	Botrytis cinerea narnavirus 4	QJT73727.1
Narnaviridae	Narnavirus	no assignment	Bremia lactucae associated narnavirus 3	QIP68021.1
Narnaviridae	Narnavirus	no assignment	Fusarium asiaticum narnavirus 1	UNG44322.1
Narnaviridae	Narnavirus	no assignment	Rhizoctonia solani narnavirus 17	UIW13890.1
Narnaviridae	Narnavirus	no assignment	Narnaviridae sp. isolate s123-k141_676873	UJQ92890.1
Narnaviridae	Narnavirus	no assignment	Narnaviridae sp. isolate 200-k141_247604	UJQ92738.1
Narnaviridae	Narnavirus	no assignment	Narnaviridae sp. isolate R40-k141_252972	URG17098.1
Narnaviridae	Narnavirus	no assignment	Narnaviridae sp. isolate R40-k141_264364	UJQ92740.1
Narnaviridae	Narnavirus	no assignment	Narnaviridae sp. isolate 125-k141_71626	UJQ92898.1
Narnaviridae	Narnavirus	no assignment	Narnaviridae sp. isolate R9-k141_672618	UJQ92889.1
Narnaviridae	Narnavirus	no assignment	Narnaviridae sp. isolate s41-k141_40154_2	URG17121.1
Narnaviridae	Narnavirus	no assignment	Wuhan insect virus 18	YP_009342440.1
Narnaviridae	Narnavirus	no assignment	Rhizopus microsporus 23S narnavirus	QBC65281.1
Narnaviridae	Narnavirus	no assignment	alvulp narnavirus 1	UVD33185.1
Narnaviridae	Narnavirus	no assignment	Narnaviridae sp. isolate L4-2	UCD55942.1
Narnaviridae	Narnavirus	no assignment	Grapevine-associated narna-like virus 12	QXN75396.1
Narnaviridae	Narnavirus	no assignment	Saccharomyces cerevisiae narnavirus 3	UQB84405.1
Narnaviridae	Narnavirus	no assignment	Hangzhou narnavirus 4	UHK03008.1
Narnaviridae	Narnavirus	no assignment	Narnaviridae sp. isolate 102-k141_127849	URG16951.1
Narnaviridae	Narnavirus	no assignment	Rhizopus microsporus 20S narnavirus	QBC65280.1
Narnaviridae	Narnavirus	no assignment	Drosophila-associated narnavirus 2	UFT26911.1
Narnaviridae	Narnavirus	no assignment	Sanya ochthera mantis narnavirus 2	UHM27598.1
Narnaviridae	Narnavirus	no assignment	Narnaviridae sp. isolate 347R-k141_717981	URG17050.1
Botourmiaviridae	Penoulivirus	Phomosis penoulivirus	Phomopsis longicolla RNA virus 1	YP_009345044.1
Botourmiaviridae	Penoulivirus	Magnaporthe penoulivirus	Magnaporthe oryzae ourmia-like virus 4	QDW80874.1
Botourmiaviridae	Penoulivirus	Neofusicoccum penoulivirus	Neofusicoccum parvum ourmia-like virus 1	QDB74998.1
Botourmiaviridae	Penoulivirus	Penoulivirus malus	Apple ourmia-like virus 2	QIC52829.1
Botourmiaviridae	Penoulivirus	Penoulivirus iotaplasmoparae	Plasmopara viticola lesion associated ourmia-like virus 91	QGY72621.1
Botourmiaviridae	no assignment	no assignment	Alashan Botou tick virus 1	UYL95440.1
Botourmiaviridae	no assignment	no assignment	Diplodia seriata botourmiavirus 2	UOK20174.1
Botourmiaviridae	no assignment	no assignment	Botourmiaviridae sp isolate s3-k141_915187	URG17202.1
Botourmiaviridae	no assignment	no assignment	Botourmiaviridae sp isolate 237b-k141_270138	URG17165.1
Botourmiaviridae	no assignment	no assignment	Botourmiaviridae sp isolate s58-k141_751890	UJQ91997.1
Botourmiaviridae	no assignment	no assignment	Botourmiaviridae sp isolate 222-k141_50154	UJQ91986.1
Botourmiaviridae	no assignment	no assignment	Botourmiaviridae sp isolate 273b-k141_163209	UJQ91957.1
Botourmiaviridae	no assignment	no assignment	Botourmiaviridae sp isolate R2-k141_1249461	UJQ91948.1
Botourmiaviridae	no assignment	no assignment	Diplodia seriata botourmiavirus 1	UOK20173.1
Botourmiaviridae	no assignment	no assignment	Fusarium mangiferae botourmiavirus 2	UBZ25887.1
Botourmiaviridae	no assignment	no assignment	Leptosphaeria biglobosa botourmiavirus 2	UYL94488.1
Botourmiaviridae	no assignment	no assignment	Ustilaginoidea virens botourmiavirus 1	UVX28913.1
Botourmiaviridae	no assignment	no assignment	Aspergillus fumigatus botourmiavirus 1	BDF97672.1
Botourmiaviridae	no assignment	no assignment	Monilinia fructicola botourmiavirus 11	UTQ48839.1
Botourmiaviridae	no assignment	no assignment	Pestalotiopsis botourmiavirus 1	QYC95708.1
Botourmiaviridae	no assignment	no assignment	Aspergillus pseudoviridinutans botourmiavirus 1	BCH36654.1
Botourmiaviridae	no assignment	no assignment	Colletotrichum camelliae botourmiavirus 1	UXM18996.1
Botourmiaviridae	no assignment	no assignment	Magnaporthe oryzae botourmiavirus 5	QLJ94076.1
"Narliviridae"	no assignment	no assignment	Changjiang narna-like virus 2	YP_009337311.1
"Narliviridae"	no assignment	no assignment	Narnaviridae sp. isolate 367R-k141_120725	UJQ92655.1
"Narliviridae"	no assignment	no assignment	Narnaviridae sp. isolate 375R-k141_508158	UJQ92844.1
"Narliviridae"	no assignment	no assignment	Hubei narna-like virus 11	YP_009336851.1
"Narliviridae"	no assignment	no assignment	Beihai narna-like virus 10	YP_009333271.1
"Narliviridae"	no assignment	no assignment	Narnaviridae sp. isolate 199-k141_344884	UJQ92781.1
"Narliviridae"	no assignment	no assignment	Vespucci virus	QIS87962.1
"Narliviridae"	no assignment	no assignment	Wenzhou narna-like virus 2	YP_009336518.1
"Narliviridae"	no assignment	no assignment	Beihai narna-like virus 4	YP_009333266.1
"Narliviridae"	no assignment	no assignment	Wenzhou narna-like virus 3	YP_009336520.1
"Narliviridae"	no assignment	no assignment	Narnaviridae sp. isolate 49-k141_281830	URG16918.1
"Narliviridae"	no assignment	no assignment	Narnaviridae sp. isolate 184-k141_183185	URG16992.1
"Narliviridae"	no assignment	no assignment	Hubei narna-like virus 1	APG77214.1
"Narliviridae"	no assignment	no assignment	Serbia narna-like virus 3	QNS17454.1
"Narliviridae"	no assignment	no assignment	Narnaviridae sp. isolate 278R-k141_377683	UJQ92800.1
"Narliviridae"	no assignment	no assignment	Shahe narna-like virus 2	YP_009336615.1
"Narliviridae"	no assignment	no assignment	Tetranychus urticae-associated narnavirus	QBS55243.1
"Narliviridae"	no assignment	no assignment	Narnaviridae sp. isolate s41-k141_276290	UJQ92752.1
"Narliviridae"	no assignment	no assignment	Wuhan spider virus 7	YP_009344979.1
"Narliviridae"	no assignment	no assignment	Flumine narna-like virus 12	UQB76039.1
Fiersviridae ("Leviviridae")	Emesvirus	Emesvirus japonicum	Enterobacteria phage GA	CAA27499.1
Fiersviridae ("Leviviridae")	Emesvirus	Emesvirus japonicum	Enterobacteria phage KU1	AAF67676.1
Fiersviridae ("Leviviridae")	Emesvirus	Emesvirus zinderi	Escherichia phage MS2	AFN39800.1
Fiersviridae ("Leviviridae")	Emesvirus	Emesvirus piscicola	ssRNA phage AVE017	DAD49859.1
Fiersviridae ("Leviviridae")	Emesvirus	no assignment	Erysiphales associated levi-like virus 1	QLL27754.1
Fiersviridae ("Leviviridae")	Emesvirus	no assignment	Plasmopara viticola lesion associated levivirus 1	QIR30323.1
Fiersviridae ("Leviviridae")	Kemicevirus	Kemicevirus caenihabitans	ssRNA phage SRR6960799_27	DAD50689.1
Fiersviridae ("Leviviridae")	Qubevirus	Qubevirus durum	Escherichia phage Qbeta	NP_046752.1
Fiersviridae ("Leviviridae")	Perrunavirus	Perrunavirus olsenii	Pseudomonas phage PRR1	ABH03629.1
Fiersviridae ("Leviviridae")	Hagavirus	Hagavirus psychrophilum	Enterobacteria phage Hgal1	YP_007237175.1
Fiersviridae ("Leviviridae")	Perrunavirus	Perrunavirus olsenii	Pseudomonas phage PRR1	YP_717671.1
Fiersviridae ("Leviviridae")	no assignment	no assignment	Leviviridae sp. isolate 254-k141_132634_2	URG16523.1
Fiersviridae ("Leviviridae")	no assignment	no assignment	Leviviridae sp. isolate 102-k141_136124	URG16205.1
Fiersviridae ("Leviviridae")	no assignment	no assignment	Leviviridae sp. isolate 168-k141_3219_2	URG15951.1
Fiersviridae ("Leviviridae")	no assignment	no assignment	Leviviridae sp. isolate 243-k141_326866	URG15743.1
Fiersviridae ("Leviviridae")	no assignment	no assignment	Leviviridae sp. isolate 278R-k141_669944	URG15576.1
Fiersviridae ("Leviviridae")	no assignment	no assignment	Leviviridae sp. isolate R30-k141_381141_2	URG16534.1
Fiersviridae ("Leviviridae")	no assignment	no assignment	Leviviridae sp. isolate 154-k141_218630_2	USC27729.1
Fiersviridae ("Leviviridae")	no assignment	no assignment	Leviviridae sp. isolate 85-k141_212488	UJQ85229.1
Fiersviridae ("Leviviridae")	no assignment	no assignment	Leviviridae sp. isolate 222-k141_15045	UJQ85079.1
