# Supplementary material for: Putative Mitoviruses without In-Frame UGA(W) Codons: Evolutionary Implications
Source: Viruses. 2023 Jan 25;15(2):340. doi: 10.3390/v15020340 (PMC9965874; doi:10.3390/v15020340)
Supplement: Supplementary file 1 [file viruses-15-00340-s001.zip › Table S2 - Result of the initial tBLASTn search of the NCBI TSA database and selection criteria.xlsx]

## Sheet: Table S2
Table S2: Result of the initial tblastn search of the NCBI TSA database and selection criteria
Clade-limited tBLASTn searches of the TSA database for: (a)					All hits resulting from the tBLASTn search: NCBI access code and TSA sequence name (GenBank)	Hypothetical ORF (TT # 4) (b) (c)	Mitovirus RdRp CPD (e-value) (d)	Sequence previously registered in the NCBI - nr protein database and annotated under the name (BLASTp searches)
Clade level 1	Clade level 2	Clade level 3	Clade level 4	NCBI ID taxonomy				Hit with higher identity	NCBI Accession code	NCBI Name	inclusion decision in our study (e)
Metazoan	Porifera			NCBI:taxid6040	GIFJ01748484.1 TSA: Halichondria panicea TRINITY_DN412788_c0_g1_i1, transcribed RNA sequence	GIFJ01547358.1	3.21e-81	52.50%	QDH86508.1	RNA-dependent RNA polymerase [Mitovirus sp.]	included
					GIFJ01017399.1 TSA: Halichondria panicea TRINITY_DN504911_c0_g1_i1, transcribed RNA sequence	GIFI01524993.1	1.06e-53	65.56%	DAZ87261.1	TPA: RNA-dependent polymerase [Athena mito-like virus]	included
					GIFJ01795042.1 TSA: Halichondria panicea TRINITY_DN459785_c0_g1_i1, transcribed RNA sequenc	GIFJ01272106.1	7.97e-62	73.44%	ASM94070.1	putative RNA-dependent RNA polymerase, partial [Barns Ness breadcrumb sponge narna-like virus 5]	No included. This sequence share putative mitovirus specie with Barns Ness breadcrumb sponge narna-like virus 5
					GIFJ01547358.1 TSA: Halichondria panicea TRINITY_DN156346_c0_g1_i1, transcribed RNA sequence	GIFJ01555191.1	2.44e-45	39.80%	QIR30235.1	RNA-dependent RNA polymerase, partial [Plasmopara viticola lesion associated mitovirus 12]	included
					GIFI01524993.1 TSA: Halisarca dujardinii TRINITY_DN164461_c0_g1_i1, transcribed RNA sequence	GIFJ01743835.1	4.25e-61	40.64%	QOW97245.1	RNA-dependent RNA polymerase [Mito-like bobnusvirus]	included
					GIFJ01272106.1 TSA: Halichondria panicea TRINITY_DN23440_c0_g1_i2, transcribed RNA sequence	GIFJ01212639.1	1.50e-49	40.71%	QDH90781.1	RNA-dependent RNA polymerase [Mitovirus sp.]	included
					GIFJ01272107.1 TSA: Halichondria panicea TRINITY_DN23440_c0_g1_i3, transcribed RNA sequence	GIFI01173896.1	6.45e-32	40.38%	QDH88941.1	RNA-dependent RNA polymerase [Mitovirus sp.]	included
					GIFJ01377189.1 TSA: Halichondria panicea TRINITY_DN75157_c0_g1_i1, transcribed RNA sequence	GIFJ01497686.1	4.04e-56	40.38%	YP_009259487.1	RNA-dependent RNA polymerase [Cronartium ribicola mitovirus 5]	included
					GIFJ01382231.1 TSA: Halichondria panicea TRINITY_DN2273_c0_g1_i4, transcribed RNA sequence	GIFI01296237.1	1.08e-42	40.09%	UJQ92489.1	putative RNA-dependent RNA polymerase [Mitoviridae sp.]	included
					GIFJ01146011.1 TSA: Halichondria panicea TRINITY_DN93190_c0_g1_i2, transcribed RNA sequence	GIFJ01594597.1	2.60e-53	38.36%	QUP79244.1	RNA-dependent RNA polymerase [Botryosphaeria dothidea mitovirus 2]	included
					GIFJ01146010.1 TSA: Halichondria panicea TRINITY_DN93190_c0_g1_i1, transcribed RNA sequence	GIFJ01605427.1	9.50e-40	41.90%	QDH88532.1	RNA-dependent RNA polymerase [Mitovirus sp.]	included
					GIFJ01555191.1 TSA: Halichondria panicea TRINITY_DN143886_c0_g1_i1, transcribed RNA sequence	GIFI01029201.1	5.28e-46	37.97%	UIW13867.1	RNA-dependent RNA polymerase [Rhizoctonia solani mitovirus 85]	included
					GIFJ01382234.1 TSA: Halichondria panicea TRINITY_DN2273_c0_g1_i7, transcribed RNA sequence	GIFJ01091934.1	1.47e-44	37.97%	UIW13867.1	RNA-dependent RNA polymerase [Rhizoctonia solani mitovirus 85]	included
					GIFJ01382236.1 TSA: Halichondria panicea TRINITY_DN2273_c0_g1_i2, transcribed RNA sequence	GIFJ01745071.1	1.86e-37	35.59%	UIW13854.1	RNA-dependent RNA polymerase [Rhizoctonia solani mitovirus 72]	included
					GIFJ01382232.1 TSA: Halichondria panicea TRINITY_DN2273_c0_g1_i5, transcribed RNA sequence	GIFJ01718267.1	6.61e-39	36.21%	AWY10962.1	RNA-dependent RNA polymerase [Sclerotinia sclerotiorum mitovirus 1-A2]	included
					GIFJ01678740.1 TSA: Halichondria panicea TRINITY_DN390270_c0_g1_i1, transcribed RNA sequence	HBWR010104953.1	6.55e-16	36.79%	UJQ92488.1	putative RNA-dependent RNA polymerase [Mitoviridae sp.]	included
					GIFJ01349914.1 TSA: Halichondria panicea TRINITY_DN39937_c0_g3_i1, transcribed RNA sequence	HBWR010342209.1	2.75e-23	36.23%	UJQ92488.1	putative RNA-dependent RNA polymerase [Mitoviridae sp.]	included
					GIFJ01794483.1 TSA: Halichondria panicea TRINITY_DN435551_c0_g1_i1, transcribed RNA sequence	GIFJ01468976.1	6.07e-25	39.33%	UIW13817.1	RNA-dependent RNA polymerase [Rhizoctonia solani mitovirus 45]	included
					GIFJ01743835.1 TSA: Halichondria panicea TRINITY_DN412966_c0_g1_i1, transcribed RNA sequence	GIFJ01349914.1	1.65e-82	47.15%	URG16751.1	RNA dependent RNA polymerase [Mitoviridae sp.]	included
					GIFI01568542.1 TSA: Halisarca dujardinii TRINITY_DN137802_c0_g1_i1, transcribed RNA sequence	GIFJ01340378.1	8.86e-46	41.63%	UIW13860.1	RNA-dependent RNA polymerase [Rhizoctonia solani mitovirus 78]	included
					GIFI01533321.1 TSA: Halisarca dujardinii TRINITY_DN146297_c0_g1_i1, transcribed RNA sequence
					GIFJ01238320.1 TSA: Halichondria panicea TRINITY_DN26765_c0_g1_i4, transcribed RNA sequence
					GIFJ01340378.1 TSA: Halichondria panicea TRINITY_DN36854_c0_g1_i1, transcribed RNA sequence
					GIFJ01212638.1 TSA: Halichondria panicea TRINITY_DN64934_c1_g1_i1, transcribed RNA sequence
					GIFJ01212639.1 TSA: Halichondria panicea TRINITY_DN64934_c0_g1_i1, transcribed RNA sequence
					GIFI01173896.1 TSA: Halisarca dujardinii TRINITY_DN87008_c0_g1_i1, transcribed RNA sequence
					GIFJ01497686.1 TSA: Halichondria panicea TRINITY_DN109165_c0_g1_i1, transcribed RNA sequence
					GIFI01296237.1 TSA: Halisarca dujardinii TRINITY_DN73070_c0_g1_i1, transcribed RNA sequence
					GIFI01296238.1 TSA: Halisarca dujardinii TRINITY_DN73070_c0_g1_i2, transcribed RNA sequence
					GIFJ01626852.1 TSA: Halichondria panicea TRINITY_DN278001_c0_g1_i1, transcribed RNA sequence
					GIFJ01521649.1 TSA: Halichondria panicea TRINITY_DN140435_c0_g1_i2, transcribed RNA sequence
					GIFJ01675836.1 TSA: Halichondria panicea TRINITY_DN322910_c0_g1_i1, transcribed RNA sequence
					GIFJ01730408.1 TSA: Halichondria panicea TRINITY_DN414416_c0_g1_i1, transcribed RNA sequence
					GIFJ01594597.1 TSA: Halichondria panicea TRINITY_DN205623_c0_g1_i1, transcribed RNA sequence
					GIFJ01474717.1 TSA: Halichondria panicea TRINITY_DN156253_c0_g1_i1, transcribed RNA sequence
					GIFI01556932.1 TSA: Halisarca dujardinii TRINITY_DN114880_c0_g1_i1, transcribed RNA sequence
					GIFJ01605427.1 TSA: Halichondria panicea TRINITY_DN223300_c0_g1_i1, transcribed RNA sequence
					GIFI01029201.1 TSA: Halisarca dujardinii TRINITY_DN26844_c0_g1_i2, transcribed RNA sequence
					GIFJ01039415.1 TSA: Halichondria panicea TRINITY_DN97821_c0_g1_i1, transcribed RNA sequence
					GIFJ01091937.1 TSA: Halichondria panicea TRINITY_DN40751_c0_g1_i8, transcribed RNA sequence
					GIFI01130448.1 TSA: Halisarca dujardinii TRINITY_DN39063_c0_g1_i1, transcribed RNA sequence
					GIFI01029200.1 TSA: Halisarca dujardinii TRINITY_DN26844_c0_g1_i1, transcribed RNA sequence
					GIFJ01311624.1 TSA: Halichondria panicea TRINITY_DN67242_c0_g1_i2, transcribed RNA sequence
					GIFI01029202.1 TSA: Halisarca dujardinii TRINITY_DN26844_c0_g1_i8, transcribed RNA sequence
					GIFJ01091935.1 TSA: Halichondria panicea TRINITY_DN40751_c0_g1_i7, transcribed RNA sequence
					GIFJ01091934.1 TSA: Halichondria panicea TRINITY_DN40751_c0_g1_i6, transcribed RNA sequence
					GIFJ01590186.1 TSA: Halichondria panicea TRINITY_DN276475_c0_g1_i1, transcribed RNA sequence
					GIFJ01705714.1 TSA: Halichondria panicea TRINITY_DN392274_c0_g1_i1, transcribed RNA sequence
					GIFJ01638856.1 TSA: Halichondria panicea TRINITY_DN294020_c0_g1_i1, transcribed RNA sequence
					GIFJ01745071.1 TSA: Halichondria panicea TRINITY_DN459114_c0_g1_i1, transcribed RNA sequence
					GIFJ01685159.1 TSA: Halichondria panicea TRINITY_DN308007_c0_g1_i1, transcribed RNA sequence
					GIFJ01718267.1 TSA: Halichondria panicea TRINITY_DN392154_c0_g1_i1, transcribed RNA sequence
					GIFJ01633759.1 TSA: Halichondria panicea TRINITY_DN203411_c0_g1_i1, transcribed RNA sequence
					GIFJ01723412.1 TSA: Halichondria panicea TRINITY_DN482586_c0_g1_i1, transcribed RNA sequence
					GIFJ01765783.1 TSA: Halichondria panicea TRINITY_DN470687_c0_g1_i1, transcribed RNA sequence
					GIFJ01729726.1 TSA: Halichondria panicea TRINITY_DN458214_c0_g1_i1, transcribed RNA sequence
					GIFJ01583795.1 TSA: Halichondria panicea TRINITY_DN288211_c0_g1_i1, transcribed RNA sequence
					HBWR010104953.1 TSA: Aplysina aerophoba, TRINITY_DN119881_c0_g1_i1, transcribed RNA sequence
					GIFJ01377187.1 TSA: Halichondria panicea TRINITY_DN75157_c1_g1_i1, transcribed RNA sequence
					GIFI01565121.1 TSA: Halisarca dujardinii TRINITY_DN127280_c0_g1_i1, transcribed RNA sequence
					GIFI01566151.1 TSA: Halisarca dujardinii TRINITY_DN100223_c0_g1_i1, transcribed RNA sequence
					GIFJ01675284.1 TSA: Halichondria panicea TRINITY_DN379313_c0_g1_i1, transcribed RNA sequence
					HBWR010342209.1 TSA: Aplysina aerophoba, TRINITY_DN142411_c0_g2_i1, transcribed RNA sequence
					GIFJ01647286.1 TSA: Halichondria panicea TRINITY_DN331103_c0_g1_i1, transcribed RNA sequence
					GIFJ01616645.1 TSA: Halichondria panicea TRINITY_DN250752_c0_g1_i1, transcribed RNA sequence
					GIFJ01468976.1 TSA: Halichondria panicea TRINITY_DN162724_c0_g1_i1, transcribed RNA sequence
					GIFJ01382235.1 TSA: Halichondria panicea TRINITY_DN2273_c0_g1_i1, transcribed RNA sequence
					GIFJ01537999.1 TSA: Halichondria panicea TRINITY_DN189462_c0_g1_i1, transcribed RNA sequence
					HBWR011080612.1 TSA: Aplysina aerophoba, TRINITY_DN284743_c0_g1_i1, transcribed RNA sequenc
					GIFI01540963.1 TSA: Halisarca dujardinii TRINITY_DN116305_c0_g1_i1, transcribed RNA sequence
					GIFJ01737623.1 TSA: Halichondria panicea TRINITY_DN483004_c0_g1_i1, transcribed RNA sequence
					GIFI01130453.1 TSA: Halisarca dujardinii TRINITY_DN39063_c0_g2_i5, transcribed RNA sequence
					GIFI01130455.1 TSA: Halisarca dujardinii TRINITY_DN39063_c0_g2_i6, transcribed RNA sequence
					GIFI01130450.1 TSA: Halisarca dujardinii TRINITY_DN39063_c0_g2_i8, transcribed RNA sequence
					GIFI01029199.1 TSA: Halisarca dujardinii TRINITY_DN26844_c0_g1_i6, transcribed RNA sequence
					GIFI01533468.1 TSA: Halisarca dujardinii TRINITY_DN116135_c0_g1_i1, transcribed RNA sequence
					GIFJ01091938.1 TSA: Halichondria panicea TRINITY_DN40751_c0_g1_i9, transcribed RNA sequence
					GIFJ01679594.1 TSA: Halichondria panicea TRINITY_DN348097_c0_g1_i1, transcribed RNA sequence
					GIFJ01724957.1 TSA: Halichondria panicea TRINITY_DN426719_c0_g1_i1, transcribed RNA sequence
					GIFJ01647079.1 TSA: Halichondria panicea TRINITY_DN351245_c0_g1_i1, transcribed RNA sequence
					GIFJ01516416.1 TSA: Halichondria panicea TRINITY_DN140524_c0_g1_i1, transcribed RNA sequence
					GIFJ01666766.1 TSA: Halichondria panicea TRINITY_DN368169_c0_g1_i1, transcribed RNA sequence
					Total: 82 TSA-Seq.	Total: 20					Total: 20
	Eumetazoa	Placozoa		NCBI:taxid10226	Total: 0	Total: 0		Total: 0
		Ctenophora		NCBI:taxid10197	Total: 0	Total: 0		Total: 0
		Cnidaria		NCBI:taxid6073	HAHC01099958.1 TSA: Calvadosia cruxmelitensis, contig Ccrux.27114.c0_g1_i1, transcribed RNA sequence	GCHW01014342.1	1.75e-19	58.73%	YP_009333146.1	RNA-dependent RNA polymerase [Beihai narna-like virus 26]	included
					GJIJ01138371.1 TSA: Chrysogorgia stellata isolate specimen 1 contig138371, transcribed RNA sequence	GJIJ01138371.1	6.76e-68	44.34%	UJQ92479.1	putative RNA-dependent RNA polymerase [Mitoviridae sp.]	included
					GJIJ01143259.1 TSA: Chrysogorgia stellata isolate specimen 1 contig143259, transcribed RNA sequence	GJIJ01133220.1	1.44e-52	38.91%	QDH88495.1	RNA-dependent RNA polymerase [Mitovirus sp.]	included
					GJIJ01133220.1 TSA: Chrysogorgia stellata isolate specimen 1 contig133220, transcribed RNA sequence	HAHD01054073.1	2.73e-55	46.12%	DAZ87243.1	TPA: RNA-dependent polymerase [Proteus mito-like virus]	included
					GJIJ01048009.1 TSA: Chrysogorgia stellata isolate specimen 1 contig48009, transcribed RNA sequence	GJIJ01108392.1	1.82e-27	48.89%	QIR30266.1	RNA-dependent RNA polymerase [Plasmopara viticola lesion associated mitovirus 43]	included
					HAHD01054073.1 TSA: Lucernaria quadricornis, contig TRINITY_DN4225_c0_g1_i1, transcribed RNA sequence	GJIJ01127044.1	5.65e-37	49.92%	UHK03166.1	RNA-dependent RNA polymerase [Hangzhou mitovirus 3]	included
					GJIJ01108392.1 TSA: Chrysogorgia stellata isolate specimen 1 contig108392, transcribed RNA sequence	GJIJ01203263.1	1.15e-43	37.90%	URG16700.1	RNA dependent RNA polymerase [Mitoviridae sp.]	included
					GJIJ01127044.1 TSA: Chrysogorgia stellata isolate specimen 1 contig127044, transcribed RNA sequence
					GJIJ01203262.1 TSA: Chrysogorgia stellata isolate specimen 1 contig203262, transcribed RNA sequence
					GJIJ01203263.1 TSA: Chrysogorgia stellata isolate specimen 1 contig203263, transcribed RNA sequence
					GJIJ01203266.1 TSA: Chrysogorgia stellata isolate specimen 1 contig203266, transcribed RNA sequence
					GIYO011619514.1 TSA: Siderastrea siderea isolate siderastrea siderea 30_200134869_S_contig_1635621, transcribed RNA sequen
					GIYN01697053.1 TSA: Porites astreoides isolate porites astreoides 30_200134869_Pa_contig_704795, transcribed RNA sequence
					HAHB01092952.1 TSA: Haliclystus sanjuanensis, contig Hsan.92952, transcribed RNA sequence
					GIYN01672935.1 TSA: Porites astreoides isolate porites astreoides 30_200134869_Pa_contig_679293, transcribed RNA sequence
					GCHW01014342.1 TSA: Hydractinia symbiolongicarpus Hydractinia_31440.0_Transcript_1/0_Confidence_8_Length_1199 transcribed RNA sequence
					GIYN01534236.1 TSA: Porites astreoides isolate porites astreoides 30_200134869_Pa_contig_538334, transcribed RNA sequence
					GIXC01138024.1 TSA: Millepora complanata 136315, transcribed RNA sequence
					GEHP01665828.1 TSA: Porites astreoides TR281773_c0_g1_i1 transcribed RNA sequence
					GFGT01398402.1 TSA: Millepora complanata TRINITY_DN227776_c0_g1_i1 transcribed RNA sequence
					GIYO011795159.1 TSA: Siderastrea siderea isolate siderastrea siderea 30_200134869_S_contig_1816087, transcribed RNA sequence
					GIYN01836789.1 TSA: Porites astreoides isolate porites astreoides 30_200134869_Pa_contig_852437, transcribed RNA sequence
					GEHP01059035.1 TSA: Porites astreoides TR56356_c0_g1_i1 transcribed RNA sequence
					FX486200.1 TSA: Porites australiensis mRNA, contig: Pau-assembly_50969, mRNA sequence
					Total: 24 TSA-Seq.	Total: 7					Total: 7
		Bilateria	Ecdysozoa	NCBI:taxid1206794	HAER01050401.1 TSA: Proasellus cantabricus, contig c42047_g1_i1, transcribed RNA sequence	GCOJ01000178.1	1.15e-43	77.82%	UJQ92483.1	Putative RNA-dependent RNA polymerase [Mitoviridae sp.]	No included. This sequence share putative mitovirus specie with the specimen UJQ92483.1
					GHZD01115106.1 TSA: Cephalotermes rectangularis isolate worker TRINITY_DN22033_c0_g1_i2, transcribed RNA sequence	GICG01006928.1	1.75e-37	45.29%	UHK03164.1	RNA-dependent RNA polymerase [Hangzhou mitovirus 1]	included
					GHZD01115105.1 TSA: Cephalotermes rectangularis isolate worker TRINITY_DN22033_c0_g1_i1, transcribed RNA sequence	GHZZ01412105.1	4.06e-34	100.00%	QQM16259.1	Putative replicase [Ransystermes virus]	No included. This sequence has the same aa sequence that Ransystermes virus
					GHUE01052094.1 TSA: Tigriopus californicus isolate SH SH_DN32410_c0_g2_i1, transcribed RNA sequence	GIAP01181059.1	2.64e-26	100.00%	QQM16269.1	Putative replicase [Punsystermes virus]	No included. This sequence has the same aa sequence that Punsystermes virus
					GCDB01026952.1 TSA: Nebalia bipes strain wildtype C221184_a_61_0_l_2723, transcribed RNA sequence
					GCOJ01000178.1 TSA: Lyssa zampa breed wildtype C100598_a_14_0_l_2666, transcribed RNA sequence
					GHZN01065443.1 TSA: Embiratermes neotenicus isolate worker TRINITY_DN22245_c0_g1_i2, transcribed RNA sequence
					GHZN01065434.1 TSA: Embiratermes neotenicus isolate worker TRINITY_DN22245_c0_g1_i1, transcribed RNA sequence
					GHUE01052095.1 TSA: Tigriopus californicus isolate SH SH_DN32410_c0_g2_i2, transcribed RNA sequence
					GHZG01115673.1 TSA: Cornitermes pugnax isolate worker TRINITY_DN28328_c1_g3_i1, transcribed RNA sequence
					GCUQ01015796.1 TSA: Nannophya pygmaea breed wildtype C64139_a_6_0_l_831, transcribed RNA sequence
					GCHC01035374.1 TSA: Hanseniella sp. AD-2014 strain wildtype C236055_a_48_0_l_2611, transcribed RNA sequence
					GERV01023171.1 TSA: Egaenus convexus breed wildtype C96360_abu63_0_le2841, transcribed RNA sequence
					GERY01013684.1 TSA: Glomeridella minima breed wildtype S13735_Lo_41859_0_abu79_6_le2814, transcribed RNA sequence
					GICG01006928.1 TSA: Austropotamobius pallipes isolate UDP1 evgE0.L.105675, transcribed RNA sequence
					GCUQ01007142.1 TSA: Nannophya pygmaea breed wildtype C40998_a_3_0_l_326, transcribed RNA sequence
					GIVF01136318.1 TSA: Chinavia impicticornis TRINITY_DN112978_c0_g1_i1, transcribed RNA sequenc
					GEOE01188475.1 TSA: Enteucha acetosae TR136297-c0_g1_i1 transcribed RNA sequence
					GGKC01062203.1 TSA: Heliconius cydno c49403_g1_i1 transcribed RNA sequence
					IAEB01028620.1 TSA: Nasutitermes takasagoensis RNA, m38825, transcribed RNA sequence
					GIAP01432426.1 TSA: Occasitermes sp. AB-2019 isolate worker+soldier TR305643_c0_g1_i1_len=1381, transcribed RNA sequence
					GHZZ01412105.1 TSA: Heterotermes ferox isolate worker+soldier TR316319_c0_g1_i1_len=2152, transcribed RNA sequence
					GHGZ01140007.1 TSA: Achaea janata Transcript_141786, transcribed RNA sequence
					GIAP01181059.1 TSA: Occasitermes sp. AB-2019 isolate worker+soldier TR120130_c0_g1_i1_len=1988, transcribed RNA sequence
					GIKQ01062567.1 TSA: Achaea janata TRINITY_DN43082_c0_g1_i1, transcribed RNA sequence
					GCUQ01006142.1 TSA: Nannophya pygmaea breed wildtype C38334_a_3_0_l_298, transcribed RNA sequence
					GGJZ01079675.1 TSA: Colias eurytheme c89885_g1_i1 transcribed RNA sequence
					GHZM01181777.1 TSA: Cryptotermes secundus isolate worker+soldier TR125605_c0_g1_i1_len=386, transcribed RNA sequence
					IAEB01028621.1 TSA: Nasutitermes takasagoensis RNA, m38827, transcribed RNA sequence
					GHIT01070078.1 TSA: Amblyseius swirskii breed swirski-mite, Koppert BV Cluster-6661.0_c3167_g1_i1, transcribed RNA sequence
					GFEO01002483.1 TSA: Tolania sp. TospME4 breed wildtype C110291__4.0, transcribed RNA sequence
					GIAP01195043.1 TSA: Occasitermes sp. AB-2019 isolate worker+soldier TR126421_c0_g1_i1_len=393, transcribed RNA sequence
					GIAP01293779.1 TSA: Occasitermes sp. AB-2019 isolate worker+soldier TR180089_c0_g1_i1_len=236, transcribed RNA sequence
					HAFC01000420.1 TSA: Proasellus karamani, contig comp457_c1_seq1, transcribed RNA sequence
					GIAP01037653.1 TSA: Occasitermes sp. AB-2019 isolate worker+soldier TR37029_c0_g1_i1_len=536, transcribed RNA sequence
					GIAP01349182.1 TSA: Occasitermes sp. AB-2019 isolate worker+soldier TR234678_c0_g1_i1_len=233, transcribed RNA sequence
					JL606665.1 TSA: Nebalia bipes DMPC15520194 mRNA sequence
					Total: 37 TSA-Seq.	Total: 4					Total: 1
			Lophotrochozoa	NCBI:taxid1206795	HBDQ01092057.1 TSA: Mytilus edulis, Cluster-74039.102322, transcribed RNA sequence	GIIM01102748.1	1.46e-30	50.00%	UHS16729.1	RNA-dependent RNA polymerase [Australasian snapper narna-like virus]	included
					GIIM01102748.1 TSA: Gigantidas vrijenhoeki isolate Gigantidas vrijenhoeki specimen1 contig102748, transcribed RNA sequence
					GGIC01634079.1 TSA: Saccostrea glomerata c483073_g1_i1 transcribed RNA sequence
					HAMO01039195.1 TSA: Platynereis dumerilii comp2263537_c0_seq1 transcribed RNA sequence
					HAMN01033802.1 TSA: Platynereis dumerilii comp2263537_c0_seq1 transcribed RNA sequence
					HALR01246290.1 TSA: Platynereis dumerilii comp2263537_c0_seq1 transcribed RNA sequence
					Total: 6 TSA-Seq.	Total: 1					Total: 1
			Myxozoa	NCBI:taxid35581	Total: 0	Total: 0
			Echinodermata	NCBI:taxid7586	GAVP01010467.1 TSA: Henricia sp. AR-2014 AMR0023.18963.0.1 transcribed RNA sequence	GIIR01116228.1	4.57e-15	33.05%	ALD89128.1	RNA-dependent RNA polymerase [Rhizoctonia solani mitovirus 9]	included
					GHJN010894371.1 TSA: Patiria miniata TRINITY_DN188570_c0_g1_i1, transcribed RNA sequence
					GHJN011493881.1 TSA: Patiria miniata TRINITY_DN446921_c0_g1_i1, transcribed RNA sequence
					GIIR01116228.1 TSA: Paracentrotus lividus TR53718_c0_g1_i1, transcribed RNA sequence
					GHJN010935888.1 TSA: Patiria miniata TRINITY_DN150791_c0_g1_i1, transcribed RNA sequence
					GGVU01070170.1 TSA: Amphiura filiformis Unigene25863_6 transcribed RNA sequence
					GHJN011412440.1 TSA: Patiria miniata TRINITY_DN244377_c1_g3_i1, transcribed RNA sequence
					Total: 7 TSA-Seq.	Total: 1					Total: 1
			Hemichordata	NCBI:taxid10219	Total: 0	Total: 0
			Urochordata	NCBI:taxid7712	GIUT01051604.1 TSA: Polycarpa mytiligera isolate Dekel_beach_20_September_2018 TRINITY_DN19608_c0_g1_i4, transcribed RNA sequence	GIUT01051606.1	1.28e-29	42.94%	UHS16730.1	RNA-dependent RNA polymerase [Largetooth flounder narna-like virus]	included
					GIUT01051606.1 TSA: Polycarpa mytiligera isolate Dekel_beach_20_September_2018 TRINITY_DN19608_c0_g1_i9, transcribed RNA sequence
					GIUT01051605.1 TSA: Polycarpa mytiligera isolate Dekel_beach_20_September_2018 TRINITY_DN19608_c0_g1_i7, transcribed RNA sequence
					Total: 3 TSA-Seq.	Total: 1.					Total: 1
			Vertebrata	NCBI:txid7742	GFHA01027891.1 TSA: Melanotaenia splendida tatei TRINITY_DN34116_c0_g1_i1 transcribed RNA sequence	GEAB01124828.1	1.23e-34	36.59%	QIR30260.1	RNA-dependent RNA polymerase [Plasmopara viticola lesion associated mitovirus 37]	included
					GFHA01064512.1 TSA: Melanotaenia splendida tatei TRINITY_DN46201_c0_g1_i1 transcribed RNA sequence	GFHA01027891.1	1.37e-86	56.00%	ANR02690.1	RNA-dependent RNA polymerase [Rhizoctonia solani mitovirus 19]	included
					GEML01315733.1 TSA: Channa argus TRINITY_DN264303_c0_g1_i1 transcribed RNA sequence
					GGPV01018976.1 TSA: Bubalus bubalis TRINITY_DN89945_c3_g6_i1 transcribed RNA sequence
					GEML01355512.1 TSA: Channa argus TRINITY_DN302883_c0_g1_i1 transcribed RNA sequence
					GEAB01124828.1 TSA: Psammomys obesus comp48527_c0_seq1_1984 transcribed RNA sequence
					GHYG01084244.1 TSA: Gymnocypris eckloni strain adult HBL_TRINITY_DN267518_c0_g1_i1, transcribed RNA sequence
					GHYG01082251.1 TSA: Gymnocypris eckloni strain adult HBL_TRINITY_DN229718_c0_g1_i1, transcribed RNA sequence
					GGPV01057620.1 TSA: Bubalus bubalis TRINITY_DN35517_c0_g1_i1 transcribed RNA sequence
					GGPV01018971.1 TSA: Bubalus bubalis TRINITY_DN89945_c2_g1_i2 transcribed RNA sequence
					GGPV01053594.1 TSA: Bubalus bubalis TRINITY_DN92308_c3_g1_i1 transcribed RNA sequence
					HAMA01032774.1 TSA: Sardina pilchardus TRINITY_DN133392_c0_g1_i1 transcribed RNA sequen
					HALZ01043830.1 TSA: Sardina pilchardus TRINITY_DN84488_c0_g1_i1 transcribed RNA sequence
					GIAU01314024.1 TSA: Lucifuga dentata TRINITY_DN13770_c0_g1_i1, transcribed RNA sequence
					Total: 14 TSA-Seq.	Total: 2					Total: 2
CruMs				NCBI:txid2608240	Total: 0	Total: 0				Total: 0	Total: 0
Malawimonadidae				NCBI:txid136088	Total: 0	Total: 0				Total: 0	Total: 0
Fornicata				NCBI:taxid207245	Total: 0	Total: 0				Total: 0	Total: 0
Parabasalia				NCBI:taxid5719	Total: 0	Total: 0				Total: 0	Total: 0
Heterolobosea				NCBI:taxid:5752	Total: 0	Total: 0				Total: 0	Total: 0
Euglenozoa				NCBI:taxid:33682	Total: 0	Total: 0				Total: 0	Total: 0
Rhodophyta				NCBI:taxid2763	GHIO010G195.1 TSA: Porolithon sp. isolate Porolithon crustose coralline algae PO_TRINITY_DN73687_c0_g1_i1, transcribed RNA sequence	HBJD01003163.1	1.85e-45	100.00%	DAZ87255.1	Despoena mito-like virus	No included. This sequence has the same aa sequence that Despoena mito-like virus
					GHIO01086039.1 TSA: Porolithon sp. isolate Porolithon crustose coralline algae PO_TRINITY_DN73687_c0_g2_i1, transcribed RNA sequence	GFTE01001740.1	1.66e-56	39.00%	QJX15643.1	putative RNA-dependent RNA polymerase [Pea associated mitovirus 1]	included
					GHIO01050807.1 TSA: Porolithon sp. isolate Porolithon crustose coralline algae PO_TRINITY_DN69255_c2_g1_i1, transcribed RNA sequence	GHIO01086039.1	1.66e-75	47.83%	BDC79611.1	RNA-dependent RNA polymerase [Mitovirus sp.]	included
					GHIO01050806.1 TSA: Porolithon sp. isolate Porolithon crustose coralline algae PO_TRINITY_DN69255_c1_g1_i1, transcribed RNA sequence	GHIO01050806.1	7.27e-72	49.03%	BDC79616.1	RNA-dependent RNA polymerase [Mitovirus sp.]	included
					GFTM01049631.1 TSA: Camontagnea oxyclada GWS016449_comp102972_c0_seq1 transcribed RNA sequence	GFTM01049631.1	4.56e-81	46.67%	UJQ92501.1	putative RNA-dependent RNA polymerase [Mitoviridae sp.]	included
					GFSZ01013708.1 TSA: Grania efflorescens SLC002_comp17082_c0_seq2 transcribed RNA sequence	GFSZ01013710.1	4.75e-72	63.29%	BDC79612.1	putative RNA-dependent RNA polymerase [Mitoviridae sp.]	included
					GFSZ01013710.1 TSA: Grania efflorescens SLC002_comp17082_c0_seq4 transcribed RNA sequence	GHIO01067222.1	2.50e-88	57.64%	URG16685.1	RNA dependent RNA polymerase [Mitoviridae sp.]	included
					GFSZ01013709.1 TSA: Grania efflorescens SLC002_comp17082_c0_seq3 transcribed RNA sequence	GFSZ01012545.1	7.70e-57	42.24%	BDC79614.1	RNA-dependent RNA polymerase [Mitovirus sp.]	included
					GHIO01067222.1 TSA: Porolithon sp. isolate Porolithon crustose coralline algae PO_TRINITY_DN71623_c0_g1_i1, transcribed RNA sequence	GFTE01001735.1	1.66e-56	39.00%	QJX15643.1	putative RNA-dependent RNA polymerase [Pea associated mitovirus 1]	included
					HBJD01003163.1 TSA: Rhodella violacea, TRINITY-DN3241-c0-g1-i1, transcribed RNA sequence	GFZU01114100.1	8.11e-64	48.37%	DAZ87243.1	TPA: RNA-dependent polymerase [Proteus mito-like virus]	included
					GFSZ01012545.1 TSA: Grania efflorescens SLC002_comp16817_c0_seq1 transcribed RNA sequence	GFTN01004842.1	7.23e-57	58.80%	URG16818.1	RNA dependent RNA polymerase [Mitoviridae sp.]	included
					GFTE01001740.1 TSA: Devaleraea mollis GWS030349_comp23548_c0_seq1 transcribed RNA sequence	GFZU01089578.1	1.31e-49	53.67%	URG16685.1	RNA dependent RNA polymerase [Mitoviridae sp.]	included
					GFTE01001735.1 TSA: Devaleraea mollis GWS030349_comp26723_c0_seq1 transcribed RNA sequence	GFSX01019172.1	2.27e-42	49.30%	BDC79611.1	RNA-dependent RNA polymerase [Mitovirus sp.]	included
					GFSX01015756.1 TSA: Acrochaetium secundatum GWSC040_comp17472_c0_seq1 transcribed RNA sequence
					GFZU01114100.1 TSA: Laurencia pacifica TRINITY_DN68062_c0_g1_i1 transcribed RNA sequence
					GFTN01004842.1 TSA: Acrochaetiales sp. 1Aus JAW4243_comp10031_c0_seq1 transcribed RNA sequence
					GFZU01021936.1 TSA: Laurencia pacifica TRINITY_DN66516_c0_g1_i1 transcribed RNA sequence
					GGUP01031927.1 TSA: Kappaphycus alvarezii c31155_g1_i1 transcribed RNA sequence
					GFSZ01012546.1 TSA: Grania efflorescens SLC002_comp16817_c1_seq1 transcribed RNA sequence
					GHIO01050808.1 TSA: Porolithon sp. isolate Porolithon crustose coralline algae PO_TRINITY_DN69255_c2_g1_i2, transcribed RNA sequence
					GFZU01089578.1 TSA: Laurencia pacifica TRINITY_DN67112_c0_g2_i1 transcribed RNA sequence
					GFZU01114106.1 TSA: Laurencia pacifica TRINITY_DN68062_c1_g1_i2 transcribed RNA sequence
					GFSX01019172.1 TSA: Acrochaetium secundatum GWSC040_comp20984_c0_seq1 transcribed RNA sequence
					GEZJ01008346.1 TSA: Gracilaria chilensis GChilensis_contig_0008363 transcribed RNA sequence
					GFZU01114107.1 TSA: Laurencia pacifica TRINITY_DN68062_c1_g1_i3 transcribed RNA sequence
					GFZU01089579.1 TSA: Laurencia pacifica TRINITY_DN67112_c0_g2_i2 transcribed RNA sequence
					GEZJ01010317.1 TSA: Gracilaria chilensis GChilensis_contig_0010340 transcribed RNA sequence
					GFZU01021938.1 TSA: Laurencia pacifica TRINITY_DN66516_c0_g3_i1 transcribed RNA sequence
					GFZU01021937.1 TSA: Laurencia pacifica TRINITY_DN66516_c0_g2_i1 transcribed RNA sequence
					GFZU01114105.1 TSA: Laurencia pacifica TRINITY_DN68062_c1_g1_i1 transcribed RNA sequence
					GEZJ01008596.1 TSA: Gracilaria chilensis GChilensis_contig_0008613 transcribed RNA sequence
					GFTN01024282.1 TSA: Acrochaetiales sp. 1Aus JAW4243_comp1854_c0_seq1 transcribed RNA sequence
					GHIO01025371.1 TSA: Porolithon sp. isolate Porolithon crustose coralline algae PO_TRINITY_DN57974_c0_g1_i1, transcribed RNA sequence
					GFTM01181246.1 TSA: Camontagnea oxyclada GWS016449_comp241090_c0_seq1 transcribed RNA sequence
					GFTN01021506.1 TSA: Acrochaetiales sp. 1Aus JAW4243_comp24526_c0_seq1 transcribed RNA sequence
					Total: 35	Total: 13					Total: 12
Glaucophyceae				NCBI:taxid38254	Total: 0	Total: 0					Total: 0
Charophytes				NCBI:taxid3146	Total: 0	Total: 0					Total: 0
Chlorophyta				NCBI:taxid3041	GFUR01036419.1 TSA: Ulva lactuca c25161_g1_i1 transcribed RNA sequence	GFWA01030331.1	6.41e-68	51.30%	UJQ92514.1	putative RNA-dependent RNA polymerase [Mitoviridae sp.]	included
					GFTX01080729.1 TSA: Ulva lactuca c34542_g1_i1 transcribed RNA sequence	GFTX01080729.1	3.32e-52	41.29%	QIR30235.1	RNA-dependent RNA polymerase, partial [Plasmopara viticola lesion associated mitovirus 12]	included
					GFTX01032221.1 TSA: Ulva lactuca c27924_g1_i1 transcribed RNA sequence	GFTX01082149.1	1.09e-24	52.22%	QIS88019.1	RNA-dependent RNA polymerase [d'Urville virus]	included
					GBAH01009343.1 TSA: Chlamydomonas acidophila contig13126 transcribed RNA sequence	GFTX01031796.1	8.16e-63	40.11%	AEY76146.1	RNA-dependent RNA polymerase [Gremmeniella abietina mitochondrial RNA virus S26]	included
					GFWA01030331.1 TSA: Chlamydomonas acidophila comp14142_c0_seq1 transcribed RNA sequence	GFTX01032221.1	1.62e-90	52.32%	URG16563.1	RNA dependent RNA polymerase [Mitoviridae sp.]	included
					GFUR01001600.1 TSA: Ulva lactuca c2043_g1_i1 transcribed RNA sequence	GFTX01027530.1	1.74e-111	55.89%	QDH88597.1	RNA-dependent RNA polymerase [Mitovirus sp.]	included
					GFTX01027530.1 TSA: Ulva lactuca c26385_g1_i1 transcribed RNA sequence	GFTX01038268.1	6.02e-116	60.84%	YP_009388498.1	RNA-dependent RNA polymerase [Neofusicoccum luteum mitovirus 1]	included
					GFUR01038640.1 TSA: Ulva lactuca c25589_g1_i1 transcribed RNA sequence
					GFTX01038268.1 TSA: Ulva lactuca c29430_g1_i1 transcribed RNA sequence
					GFUR01008794.1 TSA: Ulva lactuca c10847_g1_i1 transcribed RNA sequence
					GFTX01031796.1 TSA: Ulva lactuca c27795_g1_i2 transcribed RNA sequence
					GFTX01031795.1 TSA: Ulva lactuca c27795_g1_i1 transcribed RNA sequence
					GFUR01057100.1 TSA: Ulva lactuca c27894_g2_i4 transcribed RNA sequence
					GFTX01073145.1 TSA: Ulva lactuca c33913_g1_i6 transcribed RNA sequence
					GFTX01005027.1 TSA: Ulva lactuca c6854_g2_i1 transcribed RNA sequence
					GFTX01032036.1 TSA: Ulva lactuca c27858_g1_i1 transcribed RNA sequence
					GFUR01060619.1 TSA: Ulva lactuca c28159_g1_i1 transcribed RNA sequence
					GFTX01082149.1 TSA: Ulva lactuca c34664_g1_i1 transcribed RNA sequence
					GFTX01010601.1 TSA: Ulva lactuca c14272_g1_i1 transcribed RNA sequence
					GFTX01117076.1 TSA: Ulva lactuca c71185_g1_i1 transcribed RNA sequence
					GFTX01003003.1 TSA: Ulva lactuca c4342_g1_i1 transcribed RNA sequence
					GFUR01052989.1 TSA: Ulva lactuca c27507_g6_i2 transcribed RNA sequence
					GFUR01052986.1 TSA: Ulva lactuca c27507_g6_i1 transcribed RNA sequence
					GFTX01128288.1 TSA: Ulva lactuca c83061_g1_i1 transcribed RNA sequence
					GFTX01024410.1 TSA: Ulva lactuca c25068_g1_i1 transcribed RNA sequence
					GFTX01116765.1 TSA: Ulva lactuca c70863_g1_i1 transcribed RNA sequence
					Total: 26	Total: 7					Total: 7
Stramenopiles				NCBI:taxid33634	IABI01028452.1 TSA: Agarum clathratum mRNA, contig: Unigene19993_Aga1, transcribed RNA sequence	HBTS01020497.1	3.98e-60	100.00%	DAZ87261.1	Athena mito-like virus	No included. This sequence has the same aa sequence that Athena mito-like virus
					HBTS01020497.1 TSA: Chaetoceros curvisetus, TRINITY-DN8765-c2-g2-i1, transcribed RNA sequen	HBIX01003686.1	9.28e-56	38.46%	QED42978.1	RdRp, partial [Paraglomus mitovirus A]	included
					HBIX01003686.1 TSA: Pseudo-nitzschia australis, TRINITY-DN319-c0-g2-i1, transcribed RNA sequence
					HBMP01028039.1 TSA: Stauroneis constricta, MMETSP1352-doi:10.5281-zenodo.249982-Transcript-9029, transcribed RNA sequence
					IABI01002264.1 TSA: Agarum clathratum mRNA, contig: CL1285.Contig1_Aga1, transcribed RNA sequence
					IABI01008478.1 TSA: Agarum clathratum mRNA, contig: CL6440.Contig1_Aga1, transcribed RNA sequence
					HBOL01001850.1 TSA: Heterosigma akashiwo, TRINITY-DN11410-c0-g1-i1, transcribed RNA sequence
					FX544816.1 TSA: Pythium insidiosum mRNA, contig: UN17826, mRNA sequence
					Total: 8	Total: 2					Total: 1
Alveolata				NCBI:txid33630	GDKJ01005156.1 TSA: Colpodella angusta a121405_9 transcribed RNA sequence	GDKJ01005156.1	2.61e-54	38.40%	QXN75370.1	RNA-dependent RNA polymerase [Grapevine-associated mitovirus 17]	included
					GHVN01078894.1 TSA: Selenidium pygospionis isolate WS-2016 DN14797_c0_g1_i1, transcribed RNA sequence
					Total: 2	Total: 1					Total: 1
Rhizaria				NCBI: taxid543769	Total: 0	Total: 0
Haptista				NCBI:taxid2608109	HBKO01036369.1 TSA: Prymnesium polylepis, MMETSP0286-doi:10.5281-zenodo.249982-Transcript-42729, transcribed RNA sequence	HBKO01019713.1	8.75e-21	60.84%	YP_009388498.1	RNA-dependent RNA polymerase [Neofusicoccum luteum mitovirus 1]	included
					HBEY01026754.1 TSA: Coccolithus braarudii, MMETSP0164-doi:10.5281-zenodo.249982-Transcript-34075, transcribed RNA sequence
					HBKO01019713.1 TSA: Prymnesium polylepis, MMETSP0286-doi:10.5281-zenodo.249982-Transcript-27739, transcribed RNA sequence
					Total: 3	Total: 1					Total: 1
Ancyromonadida				NCBI:txid2686027	Total: 0	Total: 0
Cryptomonadida				NCBI:taxid3027	Total: 0	Total: 0
					total: 247	Total: 60					Total: 54
