# Supplementary material for: Putative Mitoviruses without In-Frame UGA(W) Codons: Evolutionary Implications
Source: Viruses. 2023 Jan 25;15(2):340. doi: 10.3390/v15020340 (PMC9965874; doi:10.3390/v15020340)
Supplement: Supplementary file 1 [file viruses-15-00340-s001.zip › Table S3 - Members of clades Kvaramitovirus and Arkeomitovirinae.xlsx]

## Sheet: Table S3
Table S3: Members of clades Kvaramitovirus and “Arkeomitovirinae”
												Transcriptomic or meta-transcriptomic study
Clade name	NCBI accession code (aa)	NCBI accession code (nt)	GenBank record name and name porpose	contig (nt)	ORF(nt) (a)	AT (%)	in-frame UGA	in-frame UGG	RdRp (aa)	rORF (b)		Organism (superior taxa)	Organism (specie)	sample / isolation source	Country	geographic location	DOI
New viruses proposed for the genus Kvaramitovirus (clade "A")	BK062826.1	GIFJ01468976.1	Halichondria panicea associated mitovirus 1	4772	2433	66.61	0	2	810	no		Metazoa	Halichondria panicea	body	Rusia	White Sea: the subtidal zone (0-2 m) at low-tide	N/D
	QXN75364.1	MW648458.1	Grapevine-associated mitovirus 11	3100	1845	70.52	8	0	614	no		Embryophyta; Vitaceae	Vitis vinifera	wood tissue (transversal wood fragment)	Italy	Veneto Region	10.1093/jxb/erac032
	QXN75365.1	MW648459.1	Grapevine-associated mitovirus 12	1944	1728	69.03	7	0	575	no		Embryophyta; Vitaceae	Vitis vinifera	wood tissue (transversal wood fragment)	Italy	Veneto Region	10.1093/jxb/erac032
	UNG44319.1	MZ969058.1	Fusarium asiaticum mitovirus 8	3038	2127	73.07	11	0	708	no		Fungi, Ascomycota	Fusarium asiaticum	N/D	China	Yangtze Valley Plain	N/D
Viruses proposed for the subfamily "Arkeomitovirinae" (clade "B")	ASM94066.1	MF190027.1	Barns Ness breadcrumb sponge narna like virus 1	2532	2352	58.45	0	15	783	no		Metazoa; Porifera	Halichondria panicea	N/D	Scotland	Barns Ness: Dunbar, East Lothian	10.1371/journal.pgen.1007533
	ASM94067.1	MF190028.1	Barns Ness breadcrumb sponge narna like virus 2	1317	1197	53.30	0	11	398	no		Metazoa; Porifera	Halichondria panicea	N/D	Scotland	Barns Ness: Dunbar, East Lothian	10.1371/journal.pgen.1007533
	ASM94068.1	MF190029.1	Barns Ness breadcrumb sponge narna like virus 3	1676	1572	54.83	0	12	523	no		Metazoa; Porifera	Halichondria panicea	N/D	Scotland	Barns Ness: Dunbar, East Lothian	10.1371/journal.pgen.1007533
	ASM94097.1	MF190052.1	Barns Ness serrated wrack narna like virus 1	1912	1872	55.96	0	17	623	no		SAR; Stramenopiles	Fucus serratus	N/D	Scotland	Barns Ness: Dunbar, East Lothian	10.1371/journal.pgen.1007533
	AWY11206.1	MH384387.1	Melbourne fly narnavirus 1	2714	2250	56.30	0	15	749	no		Metazoa, Diptera	Drosophila melanogaster	Pool of entire individuals less head	Australia	Melbourne	10.1098/rspb.2018.1165
	BK062827.1	HBWR010342209.1	Aplysina aerophoba associated mitovirus 1	2079	1953	60.99	0	21	650	no		Metazoa; Porifera	Aplysina aerophoba	N/D	Spain	Scuba diving in the Mediterranean coast	10.1038/s41598-020-78667-7
	BK062828.1	GFTX01082149.1	Ulva lactuca associated mitovirus 1	2261	2088	54.80	0	20	695	no		Viridiplantae; Chlorophyta	Ulva lactuca	Thalli were acclimatized to the laboratory conditions and made axenic before processing	India	Gujarat	N/D
	BK062829.1	GICG01006928.1	Austropotamobius pallipes associated mitovirus 1	1553	1449	59.24	0	5	482	no		Metazoa; Malacostraca	Austropotamobius pallipes	Abdomen muscle (adult)	France	Champigny-sur-Veude	N/D
	BK062830.1	GIIM01102748.1	Gigantidas vrijenhoeki associated mitovirus 1	2136	1887	56.62	0	20	628	no		Metazoa; Mollusca	Gigantidas vrijenhoeki	Whole body	India	deep sea hydrothermal vent. Indian Ocean: Onnuri Vent Field	N/D
	BK062831.1	GEAB01124828.1	Psammomys obesus associated mitovirus 1	1984	1950	55.39	0	11	649	no		Metazoa; Vertebrata	Psammomys obesus	hypothalamus	Australia	N/D	N/D
	BK062832.1	GIUT01051606.1	Polycarpa mytiligera associated mitovirus 1	2665	1809	53.40	0	10	602	no		Metazoa; Tunicata	Polycarpa mytiligera	Mhole body (excluding the tunic and digestive system)	Israel	Gulf of Eilat,Dekel beach	N/D
	QDH88794.1	MN034372.1	Mitovirus sp	2172	2073	49.40	0	15	690	no		N/D	N/D	ENV; Metagenome - Grassland soil	USA	California	10.1073/pnas.1908291116
	QHA33931.1	MN780847.1	Mitovirus JS5	2447	2034	53.58	0	6	677	no		Metazoa; Vertebrata	Mus musculus	Cecal content	USA		10.1128/MRA.00018-20.
	QIJ70056.1	MT129698.1	Lilsebastian narnalike virus	2200	1968	53.32	0	16	655	no		Metazoa; Vertebrata	Oryctolagus cuniculus	Cecal content	Australia	Gungahlin Region	10.1128/JVI.02119-19
	QIJ70059.1	MT129701.1	Orin narna like virus	2192	2085	47.81	0	17	694	no		Metazoa; Vertebrata	Oryctolagus cuniculus	Cecal content	Australia	Gungahlin Region	10.1128/JVI.02119-19
	QIJ70060.1	MT129702.1	Orin narna like virus	2356	2283	46.82	0	18	760	no		Metazoa; Vertebrata	Oryctolagus cuniculus	Cecal content	Australia	Gungahlin Region	10.1128/JVI.02119-19
	QIJ70072.1	MT129713.1	Wyatt narna like virus	1942	1896	48.76	0	15	631	no		Metazoa; Vertebrata	Oryctolagus cuniculus	Cecal content	Australia	Gungahlin Region	10.1128/JVI.02119-19
	QIS87948.1	MT025079.1	Schouten virus	1895	1827	60.36	0	12	608	no		Metazoa; Vertebrata	Pygoscelis papua	cloacal swab	Antarctica	Gabriel Gonzalez Videla Base	10.1038/s41396-020-0643-1
	QIS87960.1	MT025088.1	Smith virus	2475	2223	49.86	0	18	740	no		Metazoa; Vertebrata	Pygoscelis papua	cloacal swab	Antarctica	Gabriel Gonzalez Videla Base	10.1038/s41396-020-0643-1
	QIS87961.1	MT025089.1	Halley virus	2193	2103	56.59	0	14	700	no		Metazoa; Vertebrata	Pygoscelis antarcticus	cloacal swab	Antarctica	Kopitik Island	10.1038/s41396-020-0643-1
	QIS87963.1	MT025091.1	Kagge virus	2215	1836	56.61	0	12	611	no		Metazoa; Vertebrata	Pygoscelis antarcticus	cloacal swab	Antarctica	Kopitik Island	10.1038/s41396-020-0643-1
	QIS88016.1	MT025132.1	Biscoe virus	1902	1863	59.41	0	14	620	no		Metazoa; Vertebrata	Pygoscelis adeliae	cloacal swab	Antarctica	King George Island	10.1038/s41396-020-0643-1
	QIS88017.1	MT025133.1	le Maire virus	2045	1983	42.88	0	14	660	no		Metazoa; Vertebrata	Pygoscelis adeliae	cloacal swab	Antarctica	King George Island	10.1038/s41396-020-0643-1
	QIS88018.1	MT025134.1	La Roche virus	1946	1791	53.85	0	11	596	no		Metazoa; Vertebrata	Pygoscelis adeliae	cloacal swab	Antarctica	King George Island	10.1038/s41396-020-0643-1
	QIS88020.1	MT025136.1	de Lozier virus	2275	2109	54.15	0	12	702	no		Metazoa; Vertebrata	Pygoscelis adeliae	cloacal swab	Antarctica	King George Island	10.1038/s41396-020-0643-1
	QIS88049.1	MT025159.1	de Nodal virus	2093	2013	50.72	0	14	670	no		Metazoa; Vertebrata	Pygoscelis adeliae	cloacal swab	Antarctica	Kopitik Island	10.1038/s41396-020-0643-1
	QQM16269.1	MW052079.1	Punsystermes virus	1899	1914	56.92	0	8	637	no		Metazoa; Insecta	Occasitermes sp. 1 Coloni A	Whole body of 20 workers + 5 soldiers	Australia	Manly Dam, McComb Hill	10.3390/v12101145
	QQM16280.1	MW052087.1	Ansystermes virus	2123	2025	56.00	0	20	674	no		Metazoa; Insecta	Occasitermes sp. 1 Coloni B	Whole body of 20 workers + 5 soldiers	Australia	Manly Dam, McComb Hill	10.3390/v12101145
	QQM16291.1	MW052092.1	Monsystermes virus	2384	2232	53.52	0	18	743	no		Metazoa; Insecta	Occasitermes sp. 1 Coloni B	Whole body of 20 workers + 5 soldiers	Australia	Manly Dam, McComb Hill	10.3390/v12101145
	QQM16292.1	MW052094.1	Konsystermes virus	2158	2031	49.63	0	10	676	no		Metazoa; Insecta	Occasitermes sp. 1 Coloni B	Whole body of 20 workers + 5 soldiers	Australia	Manly Dam, McComb Hill	10.3390/v12101145
	QQM16317.1	MW052118.1	Jansystermes virus	2295	2106	52.20	0	13	701	no		Metazoa; Insecta	Mastotermes darwiniensis colony A	Whole body of 5 soldiers	Australia	Darwin	10.3390/v12101145
	QRW42882.1	MW052064.1	Mensystermes virus	2173	1986	50.07	0	12	661	no		Metazoa; Insecta	Heterotermes ferox colony A	Whole body of 20 workers + 5 soldiers	Australia	Manly Dam, McComb Hill	10.3390/v12101145
	QRW42892.1	MW052115.1	Mansystermes virus	2482	2343	52.50	0	21	780	no		Metazoa; Insecta	Mastotermes darwiniensis colony A	Whole body of 5 soldiers	Australia	Darwin	10.3390/v12101145
	UHK03164.1	MZ209675.1	Hangzhou mitovirus 1	2046	1953	51.17	0	11	650	no		Metazoa; Mollusca	Cipangopaludina cathayensis	Whole tissue	China	Zhejiang, Hangzhou, Fuyang	N/D
	UJQ92450.1	MZ679851.1	Henan mitolike virus	2972	2217	54.91	0	17	738	no		N/D	N/D	pig feces	China	N/D	10.1038/s41564-022-01180-2
	UJQ92475.1	MZ679881.1	Guangdong mitolike virus	2713	2220	53.78	0	14	739	no		N/D	N/D	Cattle feces	China	N/D	10.1038/s41564-022-01180-2
	UJQ92488.1	MZ679897.1	Jiangsu sediment mitolike virus 2	2201	1890	50.79	0	13	629	no		N/D	N/D	pond sediment	China	N/D	10.1038/s41564-022-01180-2
	UJQ92550.1	MZ679968.1	Mitoviridae sp.	2131	1863	53.73	0	17	620	no		N/D	N/D	pig feces	China	N/D	10.1038/s41564-022-01180-2
	UJQ92576.1	MZ679995.1	Guangxi mitolike virus 11	2615	2163	51.36	0	18	720	no		N/D	N/D	sheep feces	China	N/D	10.1038/s41564-022-01180-2
	UJQ92584.1	MZ680003.1	Henan mitolike virus 15	2742	2211	51.71	0	17	736	no		N/D	N/D	Cattle feces	China	N/D	10.1038/s41564-022-01180-2
	UJQ92596.1	MZ680017.1	Yunnan sediment mitolike virus 2	2634	2130	50.64	0	13	709	no		N/D	N/D	lake sediment	China	N/D	10.1038/s41564-022-01180-2
	UJQ92606.1	MZ680028.1	Sichuan sediment mitolike virus 4	3188	2415	52.04	0	17	804	no		N/D	N/D	fish pond sediment	China	N/D	10.1038/s41564-022-01180-2
	UJQ92609.1	MZ680031.1	Sichuan sediment mitolike virus 5	2143	1611	53.70	0	13	536	no		N/D	N/D	river sediment	China	N/D	10.1038/s41564-022-01180-2
	UOL49047.1	MZ679938.1	Guangxi mitolike virus 5	3175	2250	51.18	0	17	749	no		N/D	N/D	sheep feces	China	N/D	10.1038/s41564-022-01180-2
	UOL49050.1	MZ679962.1	Guangxi mitolike virus 9 306R-k141-387249	2667	2226	58.68	0	16	741	no		N/D	N/D	chicken feces	China	N/D	10.1038/s41564-022-01180-2
	UOL49058.1	MZ680049.1	Heilongjiang sediment mitolike virus 2	2734	2223	50.55	0	16	740	no		N/D	N/D	fish pond sediment	China	N/D	10.1038/s41564-022-01180-2
	URG15843.1	ON163204.1	Leviviridae sp.	1674	1569	55.02	0	15	522	no		N/D	N/D	Cattle feces	China	N/D	10.1038/s41564-022-01180-2
	URG16528.1	ON164320.1	Leviviridae sp.	2221	2103	45.88	0	19	700	no		N/D	N/D	pig feces	China	N/D	10.1038/s41564-022-01180-2
	URG16540.1	ON162559.1	Mitoviridae sp	1337	1230	49.44	0	8	409	no		N/D	N/D	river sediment	China	N/D	10.1038/s41564-022-01180-2
	URG16542.1	ON162847.1	Mitoviridae sp	1287	1089	47.16	0	17	362	no		N/D	N/D	sediment	China	N/D	10.1038/s41564-022-01180-2
	URG16546.1	ON163353.1	Mitoviridae sp	2139	1683	48.95	0	13	560	no		N/D	N/D	pond sediment	China	N/D	10.1038/s41564-022-01180-2
	URG16549.1	ON163659.1	Mitoviridae sp	2292	1887	56.72	0	14	628	no		N/D	N/D	reserve soil	China	N/D	10.1038/s41564-022-01180-2
	URG16646.1	ON163964.1	Mitoviridae sp	2474	1623	54.93	0	8	540	no		N/D	N/D	paddy soil	China	N/D	10.1038/s41564-022-01180-2
	URG16687.1	ON164005.1	Mitoviridae sp	2507	1899	54.97	0	13	632	no		N/D	N/D	reservoir sediment	China	N/D	10.1038/s41564-022-01180-2
	URG16752.1	ON164077.1	Mitoviridae sp	1423	1275	55.79	0	6	424	no		N/D	N/D	paddy soil	China	N/D	10.1038/s41564-022-01180-2
	URG16753.1	ON164078.1	Mitoviridae sp	1129	1113	56.51	0	7	370	no		N/D	N/D	paddy soil	China	N/D	10.1038/s41564-022-01180-2
	URG16755.1	ON164087.1	Mitoviridae sp	1351	1260	55.07	0	10	419	no		N/D	N/D	fish pond sediment	China	N/D	10.1038/s41564-022-01180-2
	URG16756.1	ON164092.1	Mitoviridae sp	1275	1254*	53.49	0	7	417	no		N/D	N/D	river sediment	China	N/D	10.1038/s41564-022-01180-2
	URG16758.1	ON164094.1	Mitoviridae sp	1269	1218*	46.48	0	7	405	no		N/D	N/D	corn field	China	N/D	10.1038/s41564-022-01180-2
	URG16760.1	ON164100.1	Mitoviridae sp	1212	1116	56.27	0	6	371	no		N/D	N/D	forest	China	N/D	10.1038/s41564-022-01180-2
	URG16762.1	ON164104.1	Mitoviridae sp	1391	1293	55.64	0	6	430	no		N/D	N/D	paddy soil	China	N/D	10.1038/s41564-022-01180-2
	URG16763.1	ON164106.1	Mitoviridae sp	1353	1332*	54.47	0	7	443	no		N/D	N/D	river sediment	China	N/D	10.1038/s41564-022-01180-2
	URG16764.1	ON164107.1	Mitoviridae sp	1248	1074	60.89	0	5	357	no		N/D	N/D	river sediment	China	N/D	10.1038/s41564-022-01180-2
	URG16766.1	ON164114.1	Mitoviridae sp	1353	1143	57.65	0	8	380	no		N/D	N/D	river sediment	China	N/D	10.1038/s41564-022-01180-2
	URG16767.1	ON164115.1	Mitoviridae sp	1162	1017*	56.71	0	6	338	no		N/D	N/D	river sediment	China	N/D	10.1038/s41564-022-01180-2
	URG16770.1	ON164122.1	Mitoviridae sp	1269	1167	57.21	0	9	388	no		N/D	N/D	reserve soil	China	N/D	10.1038/s41564-022-01180-2
	URG16771.1	ON164123.1	Mitoviridae sp	1294	1203	57.88	0	8	400	no		N/D	N/D	reserve soil	China	N/D	10.1038/s41564-022-01180-2
	URG16776.1	ON164131.1	Mitoviridae sp	1576	1497*	52.35	0	8	498	no		N/D	N/D	pond sediment	China	N/D	10.1038/s41564-022-01180-2
	URG16777.1	ON164132.1	Mitoviridae sp	1797	1551	48.52	0	13	516	no		N/D	N/D	pond sediment	China	N/D	10.1038/s41564-022-01180-2
	URG16778.1	ON164171.1	Mitoviridae sp	1789	1782	49.97	0	16	593	no		N/D	N/D	fish pond sediment	China	N/D	10.1038/s41564-022-01180-2
	URG16780.1	ON164175.1	Mitoviridae sp	1323	1209	56.92	0	9	402	no		N/D	N/D	mangrove	China	N/D	10.1038/s41564-022-01180-2
	URG16782.1	ON164184.1	Mitoviridae sp	1328	1116	61.14	0	4	371	no		N/D	N/D	riverbank	China	N/D	10.1038/s41564-022-01180-2
	URG16786.1	ON164191.1	Mitoviridae sp	1091	1068*	45.83	0	4	355	no		N/D	N/D	barren land	China	N/D	10.1038/s41564-022-01180-2
	URG16787.1	ON164196.1	Mitoviridae sp	1273	1191	59.87	0	6	396	no		N/D	N/D	pond sediment	China	N/D	10.1038/s41564-022-01180-2
	URG16789.1	ON164204.1	Mitoviridae sp	1343	1296	53.24	0	8	431	no		N/D	N/D	pond sediment	China	N/D	10.1038/s41564-022-01180-2
	URG16791.1	ON164212.1	Mitoviridae sp	1521	1398	57.42	0	8	465	no		N/D	N/D	pond sediment	China	N/D	10.1038/s41564-022-01180-2
	URG16792.1	ON164214.1	Mitoviridae sp	1676	1494	61.69	0	9	497	no		N/D	N/D	sediment	China	N/D	10.1038/s41564-022-01180-2
	URG16793.1	ON164218.1	Mitoviridae sp	1232	1158	56.70	0	10	385	no		N/D	N/D	sediment	China	N/D	10.1038/s41564-022-01180-2
	URG16793.1	ON164214.1	Mitoviridae sp	1676	1494	61.69	0	9	497	no		N/D	N/D	sediment	China	N/D	10.1038/s41564-022-01180-2
	URG16794.1	ON164220.1	Mitoviridae sp	1113	1011	50.85	0	8	336	no		N/D	N/D	sediment	China	N/D	10.1038/s41564-022-01180-2
	URG16797.1	ON164237.1	Mitoviridae sp	1219	1020	52.34	0	8	339	no		N/D	N/D	paddy soil	China	N/D	10.1038/s41564-022-01180-2
	URG16798.1	ON164239.1	Mitoviridae sp	1221	1173*	57.41	0	6	390	no		N/D	N/D	paddy soil	China	N/D	10.1038/s41564-022-01180-2
	URG16800.1	ON164241.1	Mitoviridae sp	1808	1575	58.24	0	8	524	no		N/D	N/D	lake sediment	China	N/D	10.1038/s41564-022-01180-2
	URG16801.1	ON164244.1	Mitoviridae sp	1775	1446	51.72	0	9	481	no		N/D	N/D	lake sediment	China	N/D	10.1038/s41564-022-01180-2
	URG16802.1	ON164245.1	Mitoviridae sp	1063	900*	60.67	0	5	299	no		N/D	N/D	lake sediment	China	N/D	10.1038/s41564-022-01180-2
	URG16803.1	ON164247.1	Mitoviridae sp	1218	954*	55.41	0	6	317	no		N/D	N/D	lake sediment	China	N/D	10.1038/s41564-022-01180-2
	URG16805.1	ON164249.1	Mitoviridae sp	1323	1179	61.38	0	5	392	no		N/D	N/D	lake sediment	China	N/D	10.1038/s41564-022-01180-2
	URG16806.1	ON164251.1	Mitoviridae sp	1605	1587	57.38	0	8	528	no		N/D	N/D	semi-desert pond sediment	China	N/D	10.1038/s41564-022-01180-2
	URG16808.1	ON164255.1	Mitoviridae sp	1484	1275	57.14	0	9	424	no		N/D	N/D	semi-desert pond sediment	China	N/D	10.1038/s41564-022-01180-2
	URG16809.1	ON164257.1	Mitoviridae sp	1186	1170	51.77	0	10	389	no		N/D	N/D	semi-desert pond sediment	China	N/D	10.1038/s41564-022-01180-2
	URG16820.1	ON164301.1	Mitoviridae sp	1293	1203	63.11	0	8	400	no		N/D	N/D	river sediment	China	N/D	10.1038/s41564-022-01180-2
	URG16822.1	ON164306.1	Mitoviridae sp	1083	657	55.58	0	5	218	no		N/D	N/D	river sediment	China	N/D	10.1038/s41564-022-01180-2
	URG16823.1	ON164314.1	Mitoviridae sp	1765	1725	55.41	0	13	574	no		N/D	N/D	river sediment	China	N/D	10.1038/s41564-022-01180-2
	URG16824.1	ON164319.1	Mitoviridae sp	1641	1623	51.98	0	15	540	no		N/D	N/D	pig feces	China	N/D	10.1038/s41564-022-01180-2
	URG16825.1	ON164321.1	Mitoviridae sp	1115	1041	55.69	0	12	346	no		N/D	N/D	Sheep feces	China	N/D	10.1038/s41564-022-01180-2
	URG16828.1	ON164329.1	Mitoviridae sp	1065	1056*	58.68	0	10	351	no		N/D	N/D	pond sediment	China	N/D	10.1038/s41564-022-01180-2
	URG16829.1	ON164333.1	Mitoviridae sp	1293	1134	53.83	0	7	377	no		N/D	N/D	lake sediment	China	N/D	10.1038/s41564-022-01180-2
	URG16830.1	ON164334.1	Mitoviridae sp	1362	1272	56.90	0	6	423	no		N/D	N/D	lake sediment	China	N/D	10.1038/s41564-022-01180-2
	URG16831.1	ON164335.1	Mitoviridae sp	1065	1008*	55.59	0	7	335	no		N/D	N/D	lake sediment	China	N/D	10.1038/s41564-022-01180-2
	URG16832.1	ON164336.1	Mitoviridae sp	1289	1197	55.78	0	5	398	no		N/D	N/D	lake sediment	China	N/D	10.1038/s41564-022-01180-2
	URG16838.1	ON164352.1	Mitoviridae sp	1406	1305	53.20	0	7	434	no		N/D	N/D	river sediment	China	N/D	10.1038/s41564-022-01180-2
	URG16839.1	ON164363.1	Mitoviridae sp	1576	1560	57.42	0	8	519	no		N/D	N/D	fish pond sediment	China	N/D	10.1038/s41564-022-01180-2
	URG16840.1	ON164364.1	Mitoviridae sp	1262	1089	58.64	0	8	362	no		N/D	N/D	fish pond sediment	China	N/D	10.1038/s41564-022-01180-2
	URG16841.1	ON164366.1	Mitoviridae sp	1749	1572	53.23	0	8	523	no		N/D	N/D	fish pond sediment	China	N/D	10.1038/s41564-022-01180-2
	URG16842.1	ON164367.1	Mitoviridae sp	1237	1203*	47.61	0	6	400	no		N/D	N/D	fish pond sediment	China	N/D	10.1038/s41564-022-01180-2
	URG16843.1	ON164370.1	Mitoviridae sp	1127	963	48.00	0	9	320	no		N/D	N/D	pig feces	China	N/D	10.1038/s41564-022-01180-2
	URG16844.1	ON164377.1	Mitoviridae sp	1129	1110	53.41	0	9	369	no		N/D	N/D	reservoir sediment	China	N/D	10.1038/s41564-022-01180-2
	URG16846.1	ON164380.1	Mitoviridae sp	1269	1206	54.45	0	7	401	no		N/D	N/D	reservoir sediment	China	N/D	10.1038/s41564-022-01180-2
	URG16847.1	ON164381.1	Mitoviridae sp	1361	1230	64.36	0	6	409	no		N/D	N/D	reservoir sediment	China	N/D	10.1038/s41564-022-01180-2
	URG16849.1	ON164384.1	Mitoviridae sp	1619	1581	56.39	0	9	526	no		N/D	N/D	reservoir sediment	China	N/D	10.1038/s41564-022-01180-2
	URG16852.1	ON164402.1	Mitoviridae sp	1793	1665	55.66	0	9	554	no		N/D	N/D	lake sediment	China	N/D	10.1038/s41564-022-01180-2
	URG16854.1	ON164416.1	Mitoviridae sp	1644	1614	51.64	0	11	537	no		N/D	N/D	river sediment	China	N/D	10.1038/s41564-022-01180-2
	URG16855.1	ON164422.1	Mitoviridae sp	1270	1245	60.86	0	8	414	no		N/D	N/D	fish pond sediment	China	N/D	10.1038/s41564-022-01180-2
	URG16857.1	ON164432.1	Mitoviridae sp	1185	885*	52.66	0	8	294	no		N/D	N/D	river sediment	China	N/D	10.1038/s41564-022-01180-2
	URG16858.1	ON164434.1	Mitoviridae sp	1070	1056*	56.73	0	9	351	no		N/D	N/D	river sediment	China	N/D	10.1038/s41564-022-01180-2
	URG16859.1	ON164437.1	Mitoviridae sp	1232	1095	55.44	0	6	364	no		N/D	N/D	river sediment	China	N/D	10.1038/s41564-022-01180-2
	URG16860.1	ON164439.1	Mitoviridae sp	1354	1119	57.16	0	8	372	no		N/D	N/D	river sediment	China	N/D	10.1038/s41564-022-01180-2
	URG16861.1	ON164441.1	Mitoviridae sp	1320	1311	61.13	0	10	436	no		N/D	N/D	lake sediment	China	N/D	10.1038/s41564-022-01180-2
	URG16862.1	ON164443.1	Mitoviridae sp	1493	1329	47.15	0	8	442	no		N/D	N/D	lake sediment	China	N/D	10.1038/s41564-022-01180-2
	URG16864.1	ON164450.1	Mitoviridae sp	1372	1350	60.64	0	10	449	no		N/D	N/D	wetland	China	N/D	10.1038/s41564-022-01180-2
	URG16865.1	ON164453.1	Mitoviridae sp	1273	1164	57.50	0	8	387	no		N/D	N/D	river sediment	China	N/D	10.1038/s41564-022-01180-2
	URG16866.1	ON164454.1	Mitoviridae sp	1738	1695	54.14	0	10	564	no		N/D	N/D	river sediment	China	N/D	10.1038/s41564-022-01180-2
	URG16867.1	ON164456.1	Mitoviridae sp	1753	1419	51.05	0	9	472	no		N/D	N/D	river sediment	China	N/D	10.1038/s41564-022-01180-2
	URG16869.1	ON164459.1	Mitoviridae sp	1143	1068	57.57	0	6	355	no		N/D	N/D	river sediment	China	N/D	10.1038/s41564-022-01180-2
	URG16870.1	ON164464.1	Mitoviridae sp	1787	1776	58.53	0	12	591	no		N/D	N/D	lake sediment	China	N/D	10.1038/s41564-022-01180-2
	URG16874.1	ON164476.1	Mitoviridae sp	1692	1476	46.16	0	4	491	no		N/D	N/D	old-growth forest	China	N/D	10.1038/s41564-022-01180-2
	URG16878.1	ON164486.1	Mitoviridae sp	1283	1095	56.58	0	6	364	no		N/D	N/D	fish pond sediment	China	N/D	10.1038/s41564-022-01180-2
	URG16879.1	ON164487.1	Mitoviridae sp	1285	1161	58.75	0	9	386	no		N/D	N/D	fish pond sediment	China	N/D	10.1038/s41564-022-01180-2
	URG16926.1	ON164137.1	Narnaviridae sp	1187	1080	58.05	0	9	359	no		N/D	N/D	lake sediment	China	N/D	10.1038/s41564-022-01180-2
	URG16929.1	ON164140.1	Narnaviridae sp	1270	1254	52.99	0	11	417	no		N/D	N/D	lake sediment	China	N/D	10.1038/s41564-022-01180-2
	URG16931.1	ON164142.1	Narnaviridae sp	1537	1422*	52.70	0	9	473	no		N/D	N/D	lake sediment	China	N/D	10.1038/s41564-022-01180-2
	URG16937.1	ON164149.1	Narnaviridae sp	1578	1407	52.47	0	11	468	no		N/D	N/D	shrimp pond sediment	China	N/D	10.1038/s41564-022-01180-2
	URG16938.1	ON164150.1	Narnaviridae sp	1627	1458	57.84	0	7	485	no		N/D	N/D	shrimp pond sediment	China	N/D	10.1038/s41564-022-01180-2
	URG16940.1	ON164152.1	Narnaviridae sp	1071	1026	57.33	0	5	341	no		N/D	N/D	shrimp pond sediment	China	N/D	10.1038/s41564-022-01180-2
	URG16941.1	ON164153.1	Narnaviridae sp	1121	1095	58.16	0	6	364	no		N/D	N/D	shrimp pond sediment	China	N/D	10.1038/s41564-022-01180-2
	URG16943.1	ON164155.1	Narnaviridae sp	1121	1095*	56.38	0	4	364	no		N/D	N/D	lake sediment	China	N/D	10.1038/s41564-022-01180-2
	URG16945.1	ON164157.1	Narnaviridae sp	1436	1419	57.52	0	9	472	no		N/D	N/D	lake sediment	China	N/D	10.1038/s41564-022-01180-2
	URG16946.1	ON164159.1	Narnaviridae sp	1259	1170*	58.22	0	7	389	no		N/D	N/D	fish pond sediment	China	N/D	10.1038/s41564-022-01180-2
	URG16947.1	ON164161.1	Narnaviridae sp	2280	1929	50.95	0	12	642	no		N/D	N/D	fish pond sediment	China	N/D	10.1038/s41564-022-01180-2
	URG16948.1	ON164162.1	Narnaviridae sp	1286	1182	63.30	0	7	393	no		N/D	N/D	fish pond sediment	China	N/D	10.1038/s41564-022-01180-2
	USC27719.1	ON164268.1	Mitoviridae_sp_ gcode_16	1152	855	57.20	0	5	284	no		N/D	N/D	mountain	China	N/D	10.1038/s41564-022-01180-2
	UUW21442.1	OM514563.1	Sanya mito-like virus 1	2190	2049	45.25	0	16	682	no		Embryophyta; Poaceae	Dinebra chinensis	Tissue (all)	China	Hainan, Lingshui
	UYL95345.1	ON746406.1	Xiangxi tick virus 1	2035	1971	44.67		13	656	no		Metazoa; Arachnida	Haemaphysalis longicornis	Pool of 13 adult ticks	China	Hunan	N/D
	YP009333146.1	KX883467.1	Beihai narna-like virus 26	2317	2133	58.91	0	10	710	no		Metazoa; Tunicata	Styela plicata and Stolidobranchia sp.	Pool of N individuals. Inner organs.	China	Guangxi (Costal/Marine)	10.1038/nature20167
