# Supplementary material for: Putative Mitoviruses without In-Frame UGA(W) Codons: Evolutionary Implications
Source: Viruses. 2023 Jan 25;15(2):340. doi: 10.3390/v15020340 (PMC9965874; doi:10.3390/v15020340)
Supplement: Supplementary file 1 [file viruses-15-00340-s001.zip › Table S4 - Molecular characteristics of mitoviruses and putative mitoviruses.xlsx]

## Sheet: Table S4
Table S4: Molecular characterization of mitoviruses
Family	Proposed subfamily	genus	Species (ICTV accepted)	Virus name (NCBI taxonomy database)
					genome NCBI accession code (nt)	RdRp NCBI accession code (aa)	AU content (%)	in-frame UGA codons	in-frame UGG codons	in-frame UGA codons (%)	in-frame UGG codons (%)	Average in-frame UGA codons (%)	Average in-frame UGG codons (%)	AU content (%)
Mitoviridae	"Mitovirinae"	Unuamitovirus	Unuamitovirus fugl1	Fusarium globosum mitovirus 1	LC006128	BAQ36629	66.12	13	2	86.6667	13.3333	90.7402	9.2598	69.9
			Unuamitovirus grab1	Gremmeniella mitovirus S1	AF534641	AAN05635	69.36	16	1	94.1176	5.88235
			Unuamitovirus fuve1	Fusarium verticillioides mitovirus 1	MT506024	QPK91778	71.31	11	0	100	0
			Unuamitovirus fuco1	Fusarium coeruleum mitovirus 1	LC006129	BAQ36630	71.48	13	3	81.25	18.75
			Unuamitovirus fuci2	Fusarium circinatum mitovirus 2-1	KF803547	AHI43534	71.18	11	1	91.6667	8.33333
		Duamitovirus	Duamitovirus scsc3	Sclerotinia sclerotiorum mitovirus 3	JX401537	AGC24232	63.60	11	0	100	0	42.4265	57.5735	59.2
			Duamitovirus rhso32	Rhizoctonia solani mitovirus 32	MK372901	QDW65422	56.82	1	15	6.25	93.75
			Duamitovirus scni2	Sclerotinia nivalis mitovirus 2	KT365896	ANJ77670	63.40	12	0	100	0
			Duamitovirus alal1	Alternaria alternata mitovirus 1	MK584829	QDB74990	57.36	1	16	5.88235	94.1176
			Duamitovirus azfi1	Azolla filiculoides mitovirus 1	BK010423	DAB41741	55.32	0	19	0	100
		Triamitovirus	Triamitovirus cespA	Ceratobasidium mitovirus A	KU291923	AOX47577	58.67	0	12	0	100	18.3838	81.6162	58.6
			Triamitovirus gesu1	Geopora sumneriana mitovirus 1	MN043682	QDM55307	59.41	4	7	36.3636	63.6364
			Triamitovirus rhor1	Rhizoctonia oryzae-sativae mitovirus 1	KU057949	ANA08076	60.70	0	13	0	100
			Triamitovirus rhcl1	Rhizophagus sp. RF1 mitovirus	AB558120	BAJ23143	51.92	0	17	0	100
			Triamitovirus tuex1	Tuber excavatum mitovirus	JN222389	AEP83726	62.30	5	4	55.5556	44.4444
		Kvaramitovirus	Kvaramitovirus opno7	Ophiostoma mitovirus 7	KF031943	AGT55877	70.79	3	4	42.8571	57.1429	68.5714	31.4286	58.7
			no assignment	Halichondria panicea associated mitovirus 1	GIFJ01468976.1	BK062826.1	66.61	0	2	0	100
			no assignment	Grapevine-associated mitovirus 11	MW648458.1	QXN75364.1	70.52	8	0	100	0
			no assignment	Grapevine-associated mitovirus 12	MW648459.1	QXN75365.1	69.03	7	0	100	0
			no assignment	Fusarium asiaticum mitovirus 8	MZ969058.1	UNG44319.1	73.07	11	0	100	0
		"Kvinmitovirus"	no assignment	Nebalia bipes mitovirus 1	BK061371	DAZ90606	57.66	14	4	77.7778	22.2222	71.7351	28.2649	59.9
			no assignment	Glomeridella minima mitovirus 1	BK061472	DAZ90607	63.69	23	6	79.3103	20.6897
			no assignment	Hanseniella sp. mitovirus 1	BK061473	DAZ90608	53.73	12	9	57.1429	42.8571
			no assignment	Halichondria panicea mitovirus 1	BK061365	DAZ90600	54.74	14	7	66.6667	33.3333
			no assignment	Lutzomyia longipalpis mitovirus 1	BK013136	DAD49837	69.75	14	4	77.7778	22.2222
	"Arkeomitovirinae"	no assignment	no assignment	Barns Ness breadcrumb sponge narna like virus 1	MF190027.1	ASM94066.1	58.45	0	15	0	100	0	100	54.6
				Barns Ness breadcrumb sponge narna like virus 2	MF190028.1	ASM94067.1	53.30	0	11	0	100
				Barns Ness breadcrumb sponge narna like virus 3	MF190029.1	ASM94068.1	54.83	0	12	0	100
				Barns Ness serrated wrack narna like virus 1	MF190052.1	ASM94097.1	55.96	0	17	0	100
				Melbourne fly narnavirus 1	MH384387.1	AWY11206.1	56.30	0	15	0	100
				Aplysina aerophoba associated mitovirus 1	HBWR010342209.1	BK062827.1	60.99	0	21	0	100
				Ulva lactuca associated mitovirus 1	GFTX01082149.1	BK062828.1	54.80	0	20	0	100
				Austropotamobius pallipes associated mitovirus 1	GICG01006928.1	BK062829.1	59.24	0	5	0	100
				Gigantidas vrijenhoeki associated mitovirus 1	GIIM01102748.1	BK062830.1	56.62	0	20	0	100
				Psammomys obesus associated mitovirus 1	GEAB01124828.1	BK062831.1	55.39	0	11	0	100
				Polycarpa mytiligera associated mitovirus 1	GIUT01051606.1	BK062832.1	53.40	0	10	0	100
				Mitovirus sp	MN034372.1	QDH88794.1	49.40	0	15	0	100
				Mitovirus JS5	MN780847.1	QHA33931.1	53.58	0	6	0	100
				Lilsebastian narnalike virus	MT129698.1	QIJ70056.1	53.32	0	16	0	100
				Orin narna like virus	MT129701.1	QIJ70059.1	47.81	0	17	0	100
				Orin narna like virus	MT129702.1	QIJ70060.1	46.82	0	18	0	100
				Wyatt narna like virus	MT129713.1	QIJ70072.1	48.76	0	15	0	100
				Schouten virus	MT025079.1	QIS87948.1	60.36	0	12	0	100
				Smith virus	MT025088.1	QIS87960.1	49.86	0	18	0	100
				Halley virus	MT025089.1	QIS87961.1	56.59	0	14	0	100
				Kagge virus	MT025091.1	QIS87963.1	56.61	0	12	0	100
				Biscoe virus	MT025132.1	QIS88016.1	59.41	0	14	0	100
				le Maire virus	MT025133.1	QIS88017.1	42.88	0	14	0	100
				La Roche virus	MT025134.1	QIS88018.1	53.85	0	11	0	100
				de Lozier virus	MT025136.1	QIS88020.1	54.15	0	12	0	100
				de Nodal virus	MT025159.1	QIS88049.1	50.72	0	14	0	100
				Punsystermes virus	MW052079.1	QQM16269.1	56.92	0	8	0	100
				Ansystermes virus	MW052087.1	QQM16280.1	56.00	0	20	0	100
				Monsystermes virus	MW052092.1	QQM16291.1	53.52	0	18	0	100
				Konsystermes virus	MW052094.1	QQM16292.1	49.63	0	10	0	100
				Jansystermes virus	MW052118.1	QQM16317.1	52.20	0	13	0	100
				Mensystermes virus	MW052064.1	QRW42882.1	50.07	0	12	0	100
				Mansystermes virus	MW052115.1	QRW42892.1	52.50	0	21	0	100
				Hangzhou mitovirus 1	MZ209675.1	UHK03164.1	51.17	0	11	0	100
				Henan mitolike virus	MZ679851.1	UJQ92450.1	54.91	0	17	0	100
				Guangdong mitolike virus	MZ679881.1	UJQ92475.1	53.78	0	14	0	100
				Jiangsu sediment mitolike virus 2	MZ679897.1	UJQ92488.1	50.79	0	13	0	100
				Mitoviridae sp.	MZ679968.1	UJQ92550.1	53.73	0	17	0	100
				Guangxi mitolike virus 11	MZ679995.1	UJQ92576.1	51.36	0	18	0	100
				Henan mitolike virus 15	MZ680003.1	UJQ92584.1	51.71	0	17	0	100
				Yunnan sediment mitolike virus 2	MZ680017.1	UJQ92596.1	50.64	0	13	0	100
				Sichuan sediment mitolike virus 4	MZ680028.1	UJQ92606.1	52.04	0	17	0	100
				Sichuan sediment mitolike virus 5	MZ680031.1	UJQ92609.1	53.70	0	13	0	100
				Guangxi mitolike virus 5	MZ679938.1	UOL49047.1	51.18	0	17	0	100
				Guangxi mitolike virus 9 306R-k141-387249	MZ679962.1	UOL49050.1	58.68	0	16	0	100
				Heilongjiang sediment mitolike virus 2	MZ680049.1	UOL49058.1	50.55	0	16	0	100
				Leviviridae sp.	ON163204.1	URG15843.1	55.02	0	15	0	100
				Leviviridae sp.	ON164320.1	URG16528.1	45.88	0	19	0	100
				Mitoviridae sp	ON162559.1	URG16540.1	49.44	0	8	0	100
				Mitoviridae sp	ON162847.1	URG16542.1	47.16	0	17	0	100
				Mitoviridae sp	ON163353.1	URG16546.1	48.95	0	13	0	100
				Mitoviridae sp	ON163659.1	URG16549.1	56.72	0	14	0	100
				Mitoviridae sp	ON163964.1	URG16646.1	54.93	0	8	0	100
				Mitoviridae sp	ON164005.1	URG16687.1	54.97	0	13	0	100
				Mitoviridae sp	ON164077.1	URG16752.1	55.79	0	6	0	100
				Mitoviridae sp	ON164078.1	URG16753.1	56.51	0	7	0	100
				Mitoviridae sp	ON164087.1	URG16755.1	55.07	0	10	0	100
				Mitoviridae sp	ON164092.1	URG16756.1	53.49	0	7	0	100
				Mitoviridae sp	ON164094.1	URG16758.1	46.48	0	7	0	100
				Mitoviridae sp	ON164100.1	URG16760.1	56.27	0	6	0	100
				Mitoviridae sp	ON164104.1	URG16762.1	55.64	0	6	0	100
				Mitoviridae sp	ON164106.1	URG16763.1	54.47	0	7	0	100
				Mitoviridae sp	ON164107.1	URG16764.1	60.89	0	5	0	100
				Mitoviridae sp	ON164114.1	URG16766.1	57.65	0	8	0	100
				Mitoviridae sp	ON164115.1	URG16767.1	56.71	0	6	0	100
				Mitoviridae sp	ON164122.1	URG16770.1	57.21	0	9	0	100
				Mitoviridae sp	ON164123.1	URG16771.1	57.88	0	8	0	100
				Mitoviridae sp	ON164131.1	URG16776.1	52.35	0	8	0	100
				Mitoviridae sp	ON164132.1	URG16777.1	48.52	0	13	0	100
				Mitoviridae sp	ON164171.1	URG16778.1	49.97	0	16	0	100
				Mitoviridae sp	ON164175.1	URG16780.1	56.92	0	9	0	100
				Mitoviridae sp	ON164184.1	URG16782.1	61.14	0	4	0	100
				Mitoviridae sp	ON164191.1	URG16786.1	45.83	0	4	0	100
				Mitoviridae sp	ON164196.1	URG16787.1	59.87	0	6	0	100
				Mitoviridae sp	ON164204.1	URG16789.1	53.24	0	8	0	100
				Mitoviridae sp	ON164212.1	URG16791.1	57.42	0	8	0	100
				Mitoviridae sp	ON164214.1	URG16792.1	61.69	0	9	0	100
				Mitoviridae sp	ON164218.1	URG16793.1	56.70	0	10	0	100
				Mitoviridae sp	ON164214.1	URG16793.1	61.69	0	9	0	100
				Mitoviridae sp	ON164220.1	URG16794.1	50.85	0	8	0	100
				Mitoviridae sp	ON164237.1	URG16797.1	52.34	0	8	0	100
				Mitoviridae sp	ON164239.1	URG16798.1	57.41	0	6	0	100
				Mitoviridae sp	ON164241.1	URG16800.1	58.24	0	8	0	100
				Mitoviridae sp	ON164244.1	URG16801.1	51.72	0	9	0	100
				Mitoviridae sp	ON164245.1	URG16802.1	60.67	0	5	0	100
				Mitoviridae sp	ON164247.1	URG16803.1	55.41	0	6	0	100
				Mitoviridae sp	ON164249.1	URG16805.1	61.38	0	5	0	100
				Mitoviridae sp	ON164251.1	URG16806.1	57.38	0	8	0	100
				Mitoviridae sp	ON164255.1	URG16808.1	57.14	0	9	0	100
				Mitoviridae sp	ON164257.1	URG16809.1	51.77	0	10	0	100
				Mitoviridae sp	ON164301.1	URG16820.1	63.11	0	8	0	100
				Mitoviridae sp	ON164306.1	URG16822.1	55.58	0	5	0	100
				Mitoviridae sp	ON164314.1	URG16823.1	55.41	0	13	0	100
				Mitoviridae sp	ON164319.1	URG16824.1	51.98	0	15	0	100
				Mitoviridae sp	ON164321.1	URG16825.1	55.69	0	12	0	100
				Mitoviridae sp	ON164329.1	URG16828.1	58.68	0	10	0	100
				Mitoviridae sp	ON164333.1	URG16829.1	53.83	0	7	0	100
				Mitoviridae sp	ON164334.1	URG16830.1	56.90	0	6	0	100
				Mitoviridae sp	ON164335.1	URG16831.1	55.59	0	7	0	100
				Mitoviridae sp	ON164336.1	URG16832.1	55.78	0	5	0	100
				Mitoviridae sp	ON164352.1	URG16838.1	53.20	0	7	0	100
				Mitoviridae sp	ON164363.1	URG16839.1	57.42	0	8	0	100
				Mitoviridae sp	ON164364.1	URG16840.1	58.64	0	8	0	100
				Mitoviridae sp	ON164366.1	URG16841.1	53.23	0	8	0	100
				Mitoviridae sp	ON164367.1	URG16842.1	47.61	0	6	0	100
				Mitoviridae sp	ON164370.1	URG16843.1	48.00	0	9	0	100
				Mitoviridae sp	ON164377.1	URG16844.1	53.41	0	9	0	100
				Mitoviridae sp	ON164380.1	URG16846.1	54.45	0	7	0	100
				Mitoviridae sp	ON164381.1	URG16847.1	64.36	0	6	0	100
				Mitoviridae sp	ON164384.1	URG16849.1	56.39	0	9	0	100
				Mitoviridae sp	ON164402.1	URG16852.1	55.66	0	9	0	100
				Mitoviridae sp	ON164416.1	URG16854.1	51.64	0	11	0	100
				Mitoviridae sp	ON164422.1	URG16855.1	60.86	0	8	0	100
				Mitoviridae sp	ON164432.1	URG16857.1	52.66	0	8	0	100
				Mitoviridae sp	ON164434.1	URG16858.1	56.73	0	9	0	100
				Mitoviridae sp	ON164437.1	URG16859.1	55.44	0	6	0	100
				Mitoviridae sp	ON164439.1	URG16860.1	57.16	0	8	0	100
				Mitoviridae sp	ON164441.1	URG16861.1	61.13	0	10	0	100
				Mitoviridae sp	ON164443.1	URG16862.1	47.15	0	8	0	100
				Mitoviridae sp	ON164450.1	URG16864.1	60.64	0	10	0	100
				Mitoviridae sp	ON164453.1	URG16865.1	57.50	0	8	0	100
				Mitoviridae sp	ON164454.1	URG16866.1	54.14	0	10	0	100
				Mitoviridae sp	ON164456.1	URG16867.1	51.05	0	9	0	100
				Mitoviridae sp	ON164459.1	URG16869.1	57.57	0	6	0	100
				Mitoviridae sp	ON164464.1	URG16870.1	58.53	0	12	0	100
				Mitoviridae sp	ON164476.1	URG16874.1	46.16	0	4	0	100
				Mitoviridae sp	ON164486.1	URG16878.1	56.58	0	6	0	100
				Mitoviridae sp	ON164487.1	URG16879.1	58.75	0	9	0	100
				Narnaviridae sp	ON164137.1	URG16926.1	58.05	0	9	0	100
				Narnaviridae sp	ON164140.1	URG16929.1	52.99	0	11	0	100
				Narnaviridae sp	ON164142.1	URG16931.1	52.70	0	9	0	100
				Narnaviridae sp	ON164149.1	URG16937.1	52.47	0	11	0	100
				Narnaviridae sp	ON164150.1	URG16938.1	57.84	0	7	0	100
				Narnaviridae sp	ON164152.1	URG16940.1	57.33	0	5	0	100
				Narnaviridae sp	ON164153.1	URG16941.1	58.16	0	6	0	100
				Narnaviridae sp	ON164155.1	URG16943.1	56.38	0	4	0	100
				Narnaviridae sp	ON164157.1	URG16945.1	57.52	0	9	0	100
				Narnaviridae sp	ON164159.1	URG16946.1	58.22	0	7	0	100
				Narnaviridae sp	ON164161.1	URG16947.1	50.95	0	12	0	100
				Narnaviridae sp	ON164162.1	URG16948.1	63.30	0	7	0	100
				Mitoviridae_sp_ gcode_16	ON164268.1	USC27719.1	57.20	0	5	0	100
				Sanya mito-like virus 1	OM514563.1	UUW21442.1	45.25	0	16	0	100
				Xiangxi tick virus 1	ON746406.1	UYL95345.1	44.67	0	13	0	100
				Beihai narna-like virus 26	KX883467.1	YP009333146.1	58.91	0	10	0	100
